# Supplementary material for: Novel Hybrid Compounds Containing Benzofuroxan and Aminothiazole Scaffolds: Synthesis and Evaluation of Their Anticancer Activity
Source: MDPI journal article supplement (doi:10.3390/ijms22147497), 2021-07-13
Supplement: s1 [file s1]

# Novel hybrid compounds containing benzofuroxan and aminothiazole scaffolds: synthesis and evaluation of their anticancer activity.

Elena Chugunova <sup>1,2,\*</sup>, Gabriele Micheletti <sup>3</sup>, Dario Telese <sup>3</sup>, Carla Boga <sup>3</sup>, Daut Islamov <sup>1</sup>, Konstantin Usachev <sup>5</sup>, Alexander Burilov <sup>1,2</sup>, Alena Tulesinova <sup>4</sup>, Alexandra Voloshina <sup>1</sup>, Anna Lyubina <sup>1</sup>, Syumbelya Amerhanova <sup>1</sup>, Tatiana Gerasimova <sup>1</sup>, Aisylu Gilfanova <sup>1</sup>, Victor Syakaev <sup>1</sup>

<sup>1</sup> Arbuzov Institute of Organic and Physical Chemistry, FRC Kazan Scientific Center, Russian Academy of Sciences, Akad. Arbuzov st. 8, Kazan, Tatarstan 420088, Russia;

<sup>2</sup> Laboratory of Plant Infectious Diseases, FRC Kazan Scientific Center of Russian Academy of Sciences, Lobachevskogo st. 2/31, Kazan, Tatarstan 420111 Russia.

<sup>3</sup> Department of Industrial Chemistry 'Toso Montanari', Alma Mater Studiorum –Università di Bologna Viale Del Risorgimento, 4 Bologna, 40136, Italy.

<sup>4</sup> The Kazan National Research Technological University, Karl Marx st., 68, Kazan, 420015, Russia.

<sup>5</sup> Kazan Institute of Biochemistry and Biophysics, FRC Kazan Scientific Center of Russian Academy of Sciences, Institute of Chemical Engineering and Technology Lobachevskogo st. 2/31, Kazan, Tatarstan 420111 Russia;

\* Correspondence: [chugunova.e.a@gmail.com](mailto:chugunova.e.a@gmail.com) (E.C.); [gabriele.micheletti3@unibo.it](mailto:gabriele.micheletti3@unibo.it) (G.M.), [carla.boga@unibo.it](mailto:carla.boga@unibo.it) (C.B.); Tel.: +7-843-272-7324 (E.C.); Tel.: +39-051-209-3616 (C.B.; G.M.)

## Contents

|                               |       |
|-------------------------------|-------|
| Copies of NMR spectra .....   | 2-15  |
| UV/Vis spectral studies ..... | 16-17 |
| ADMET predictions.....        | 18-25 |

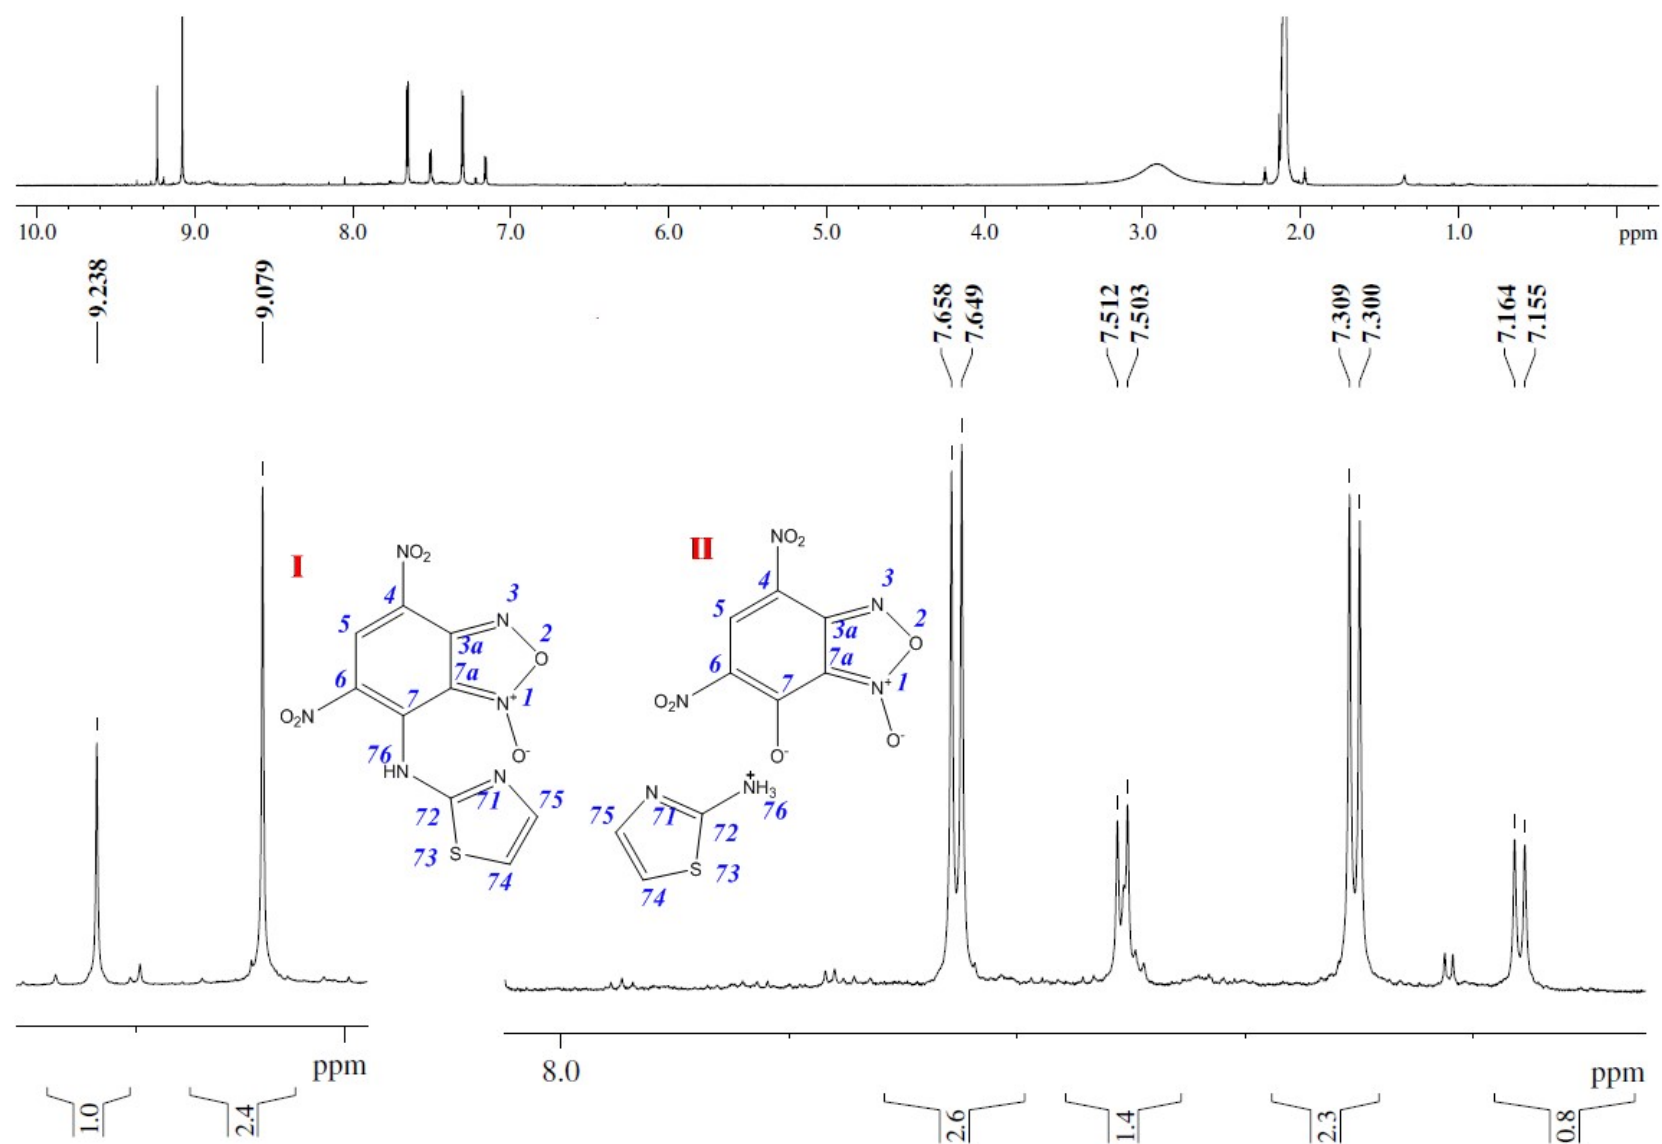

**Figure S1.**  $^1\text{H}$  NMR (acetone- $d_6$ , 500 MHz, 303 K) mixture of compound **3b** and **6**.

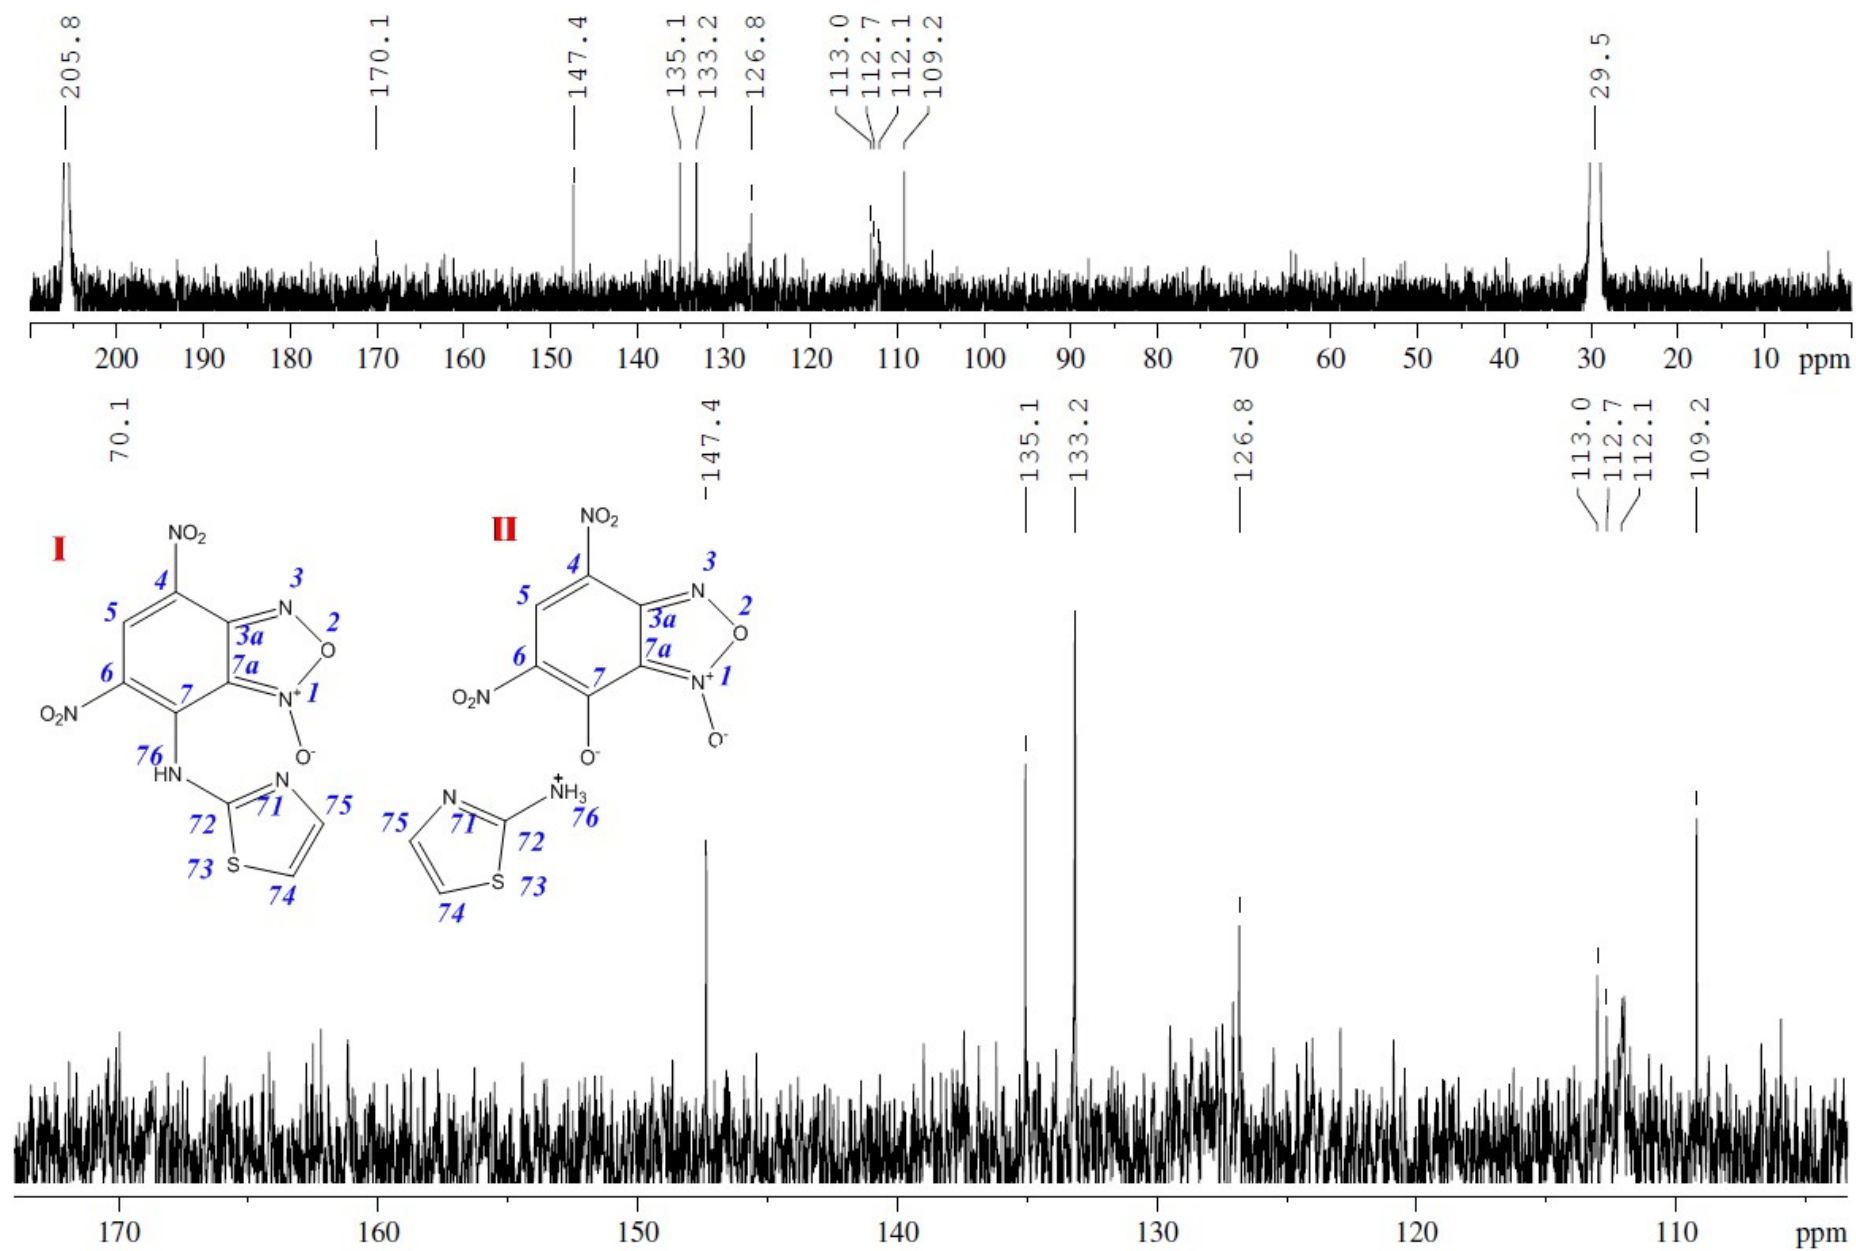

**Figure S2.**  $^{13}\text{C}\{^1\text{H}\}$  NMR (acetone- $d_6$ , 126 MHz, 303 K) mixture of compound **3b** and **6**.

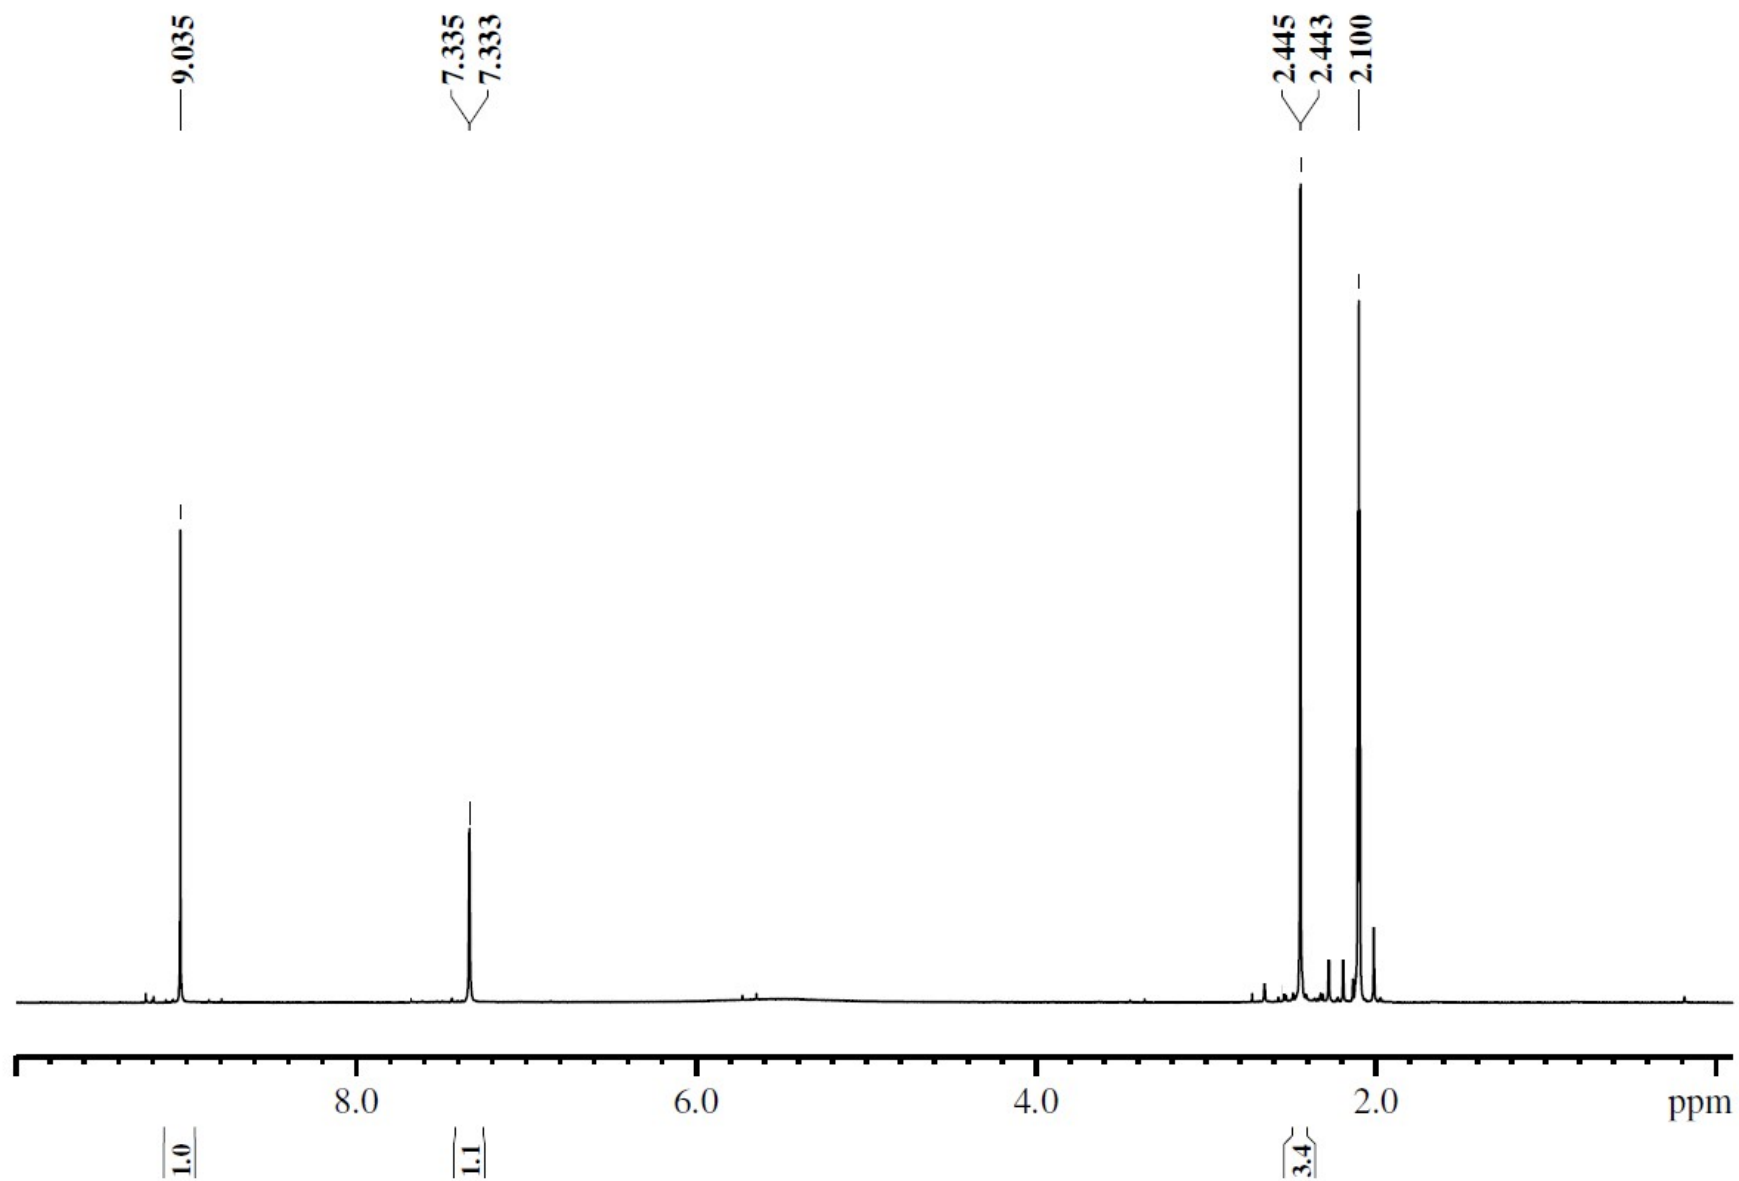

**Figure S3.** <sup>1</sup>H NMR (acetone-d<sub>6</sub>, 500 MHz, 303 K) of compound **3b**.

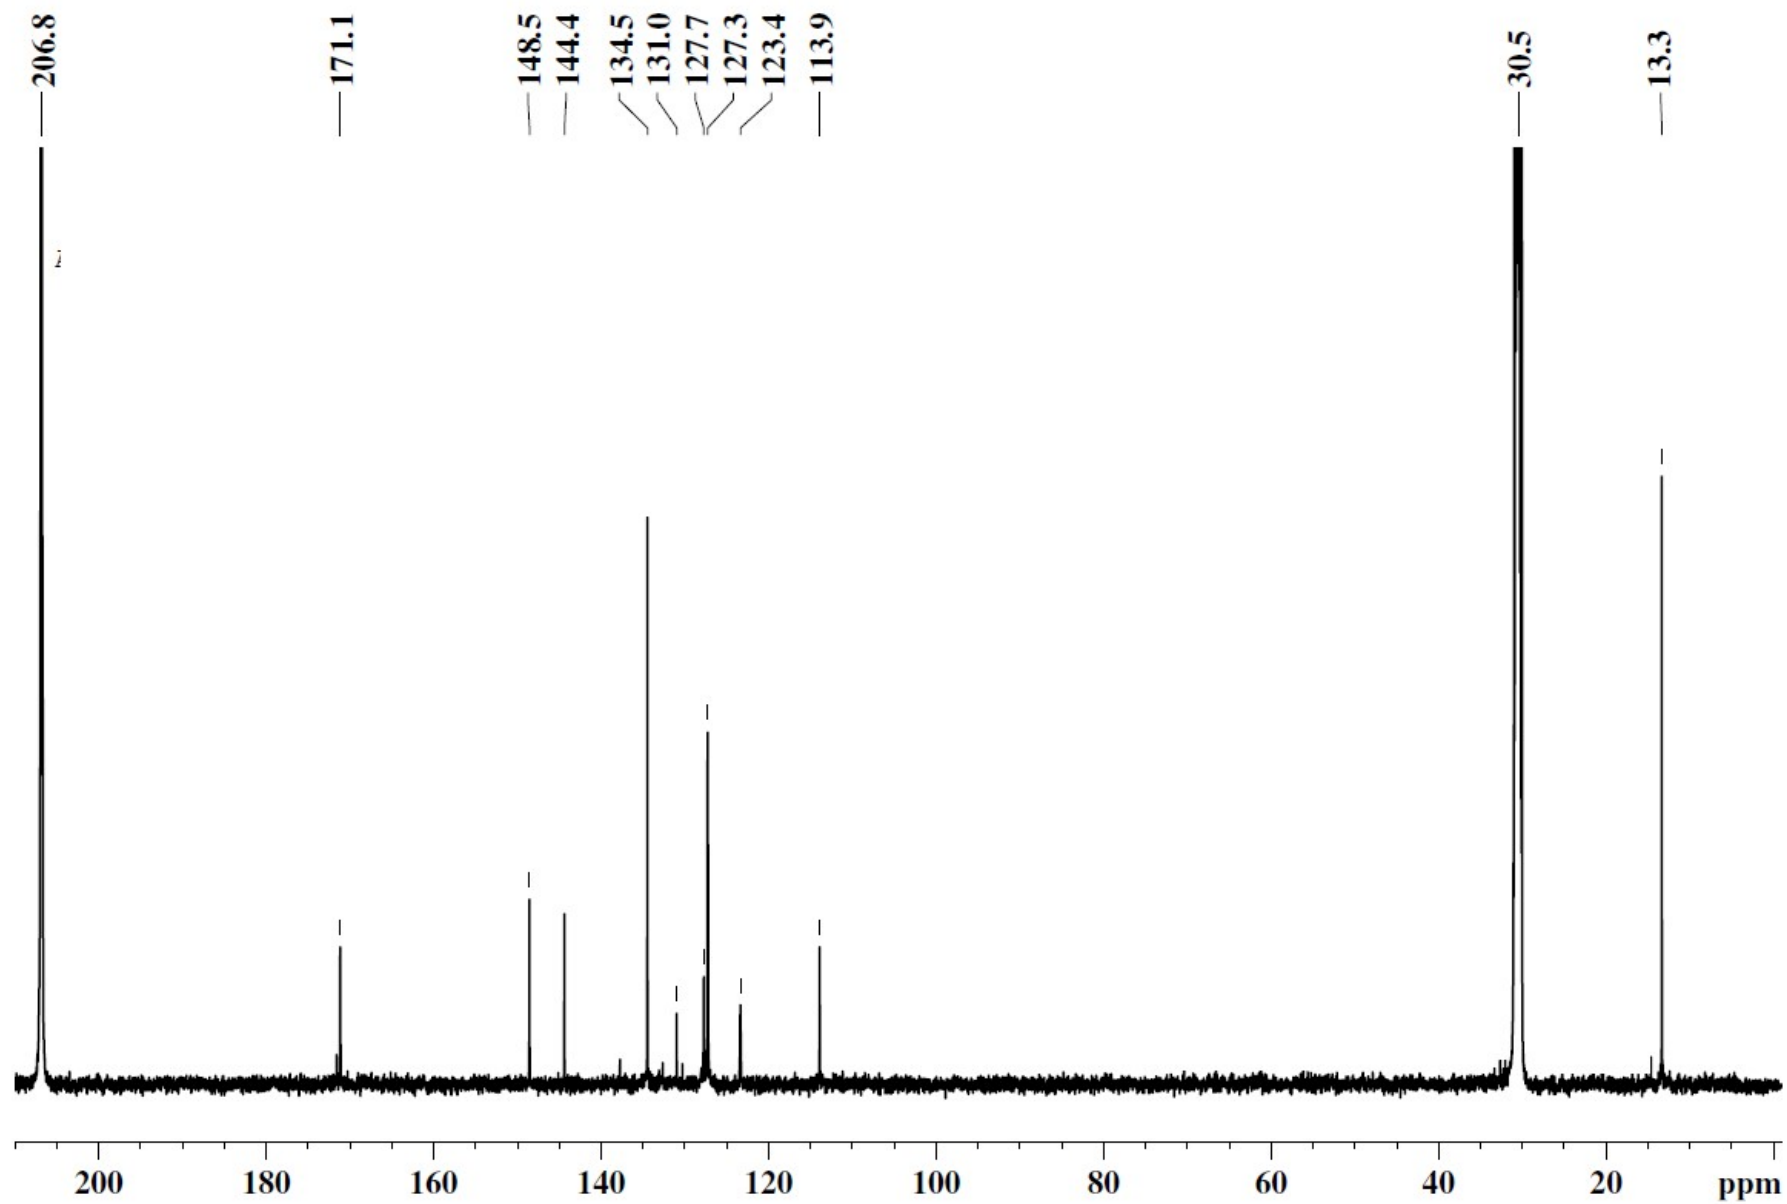

**Figure S4.**  $^{13}\text{C}\{^1\text{H}\}$  NMR (acetone- $\text{d}_6$ , 126 MHz, 303 K) of compound **3b**.

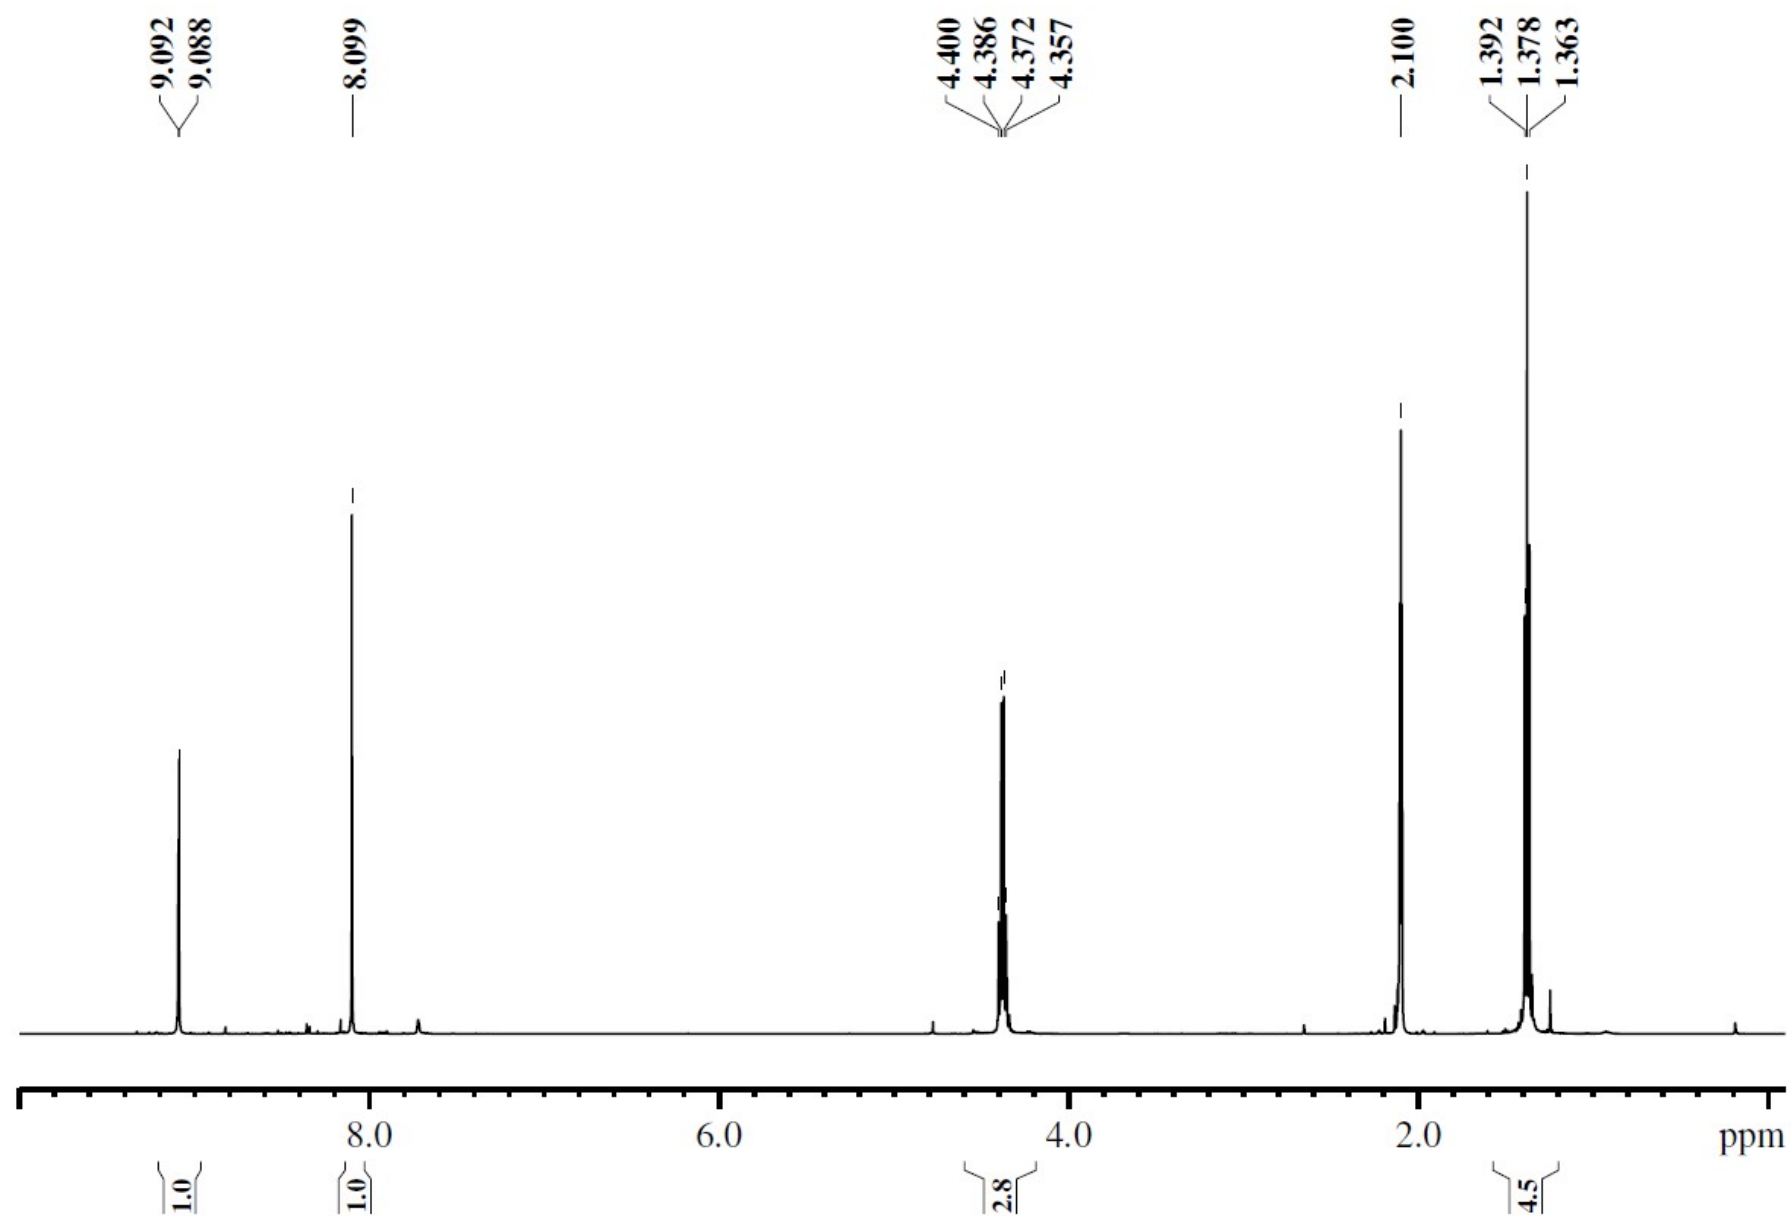

**Figure S5.** <sup>1</sup>H NMR (acetone-d<sub>6</sub>, 500 MHz, 303 K) of compound **3c**.

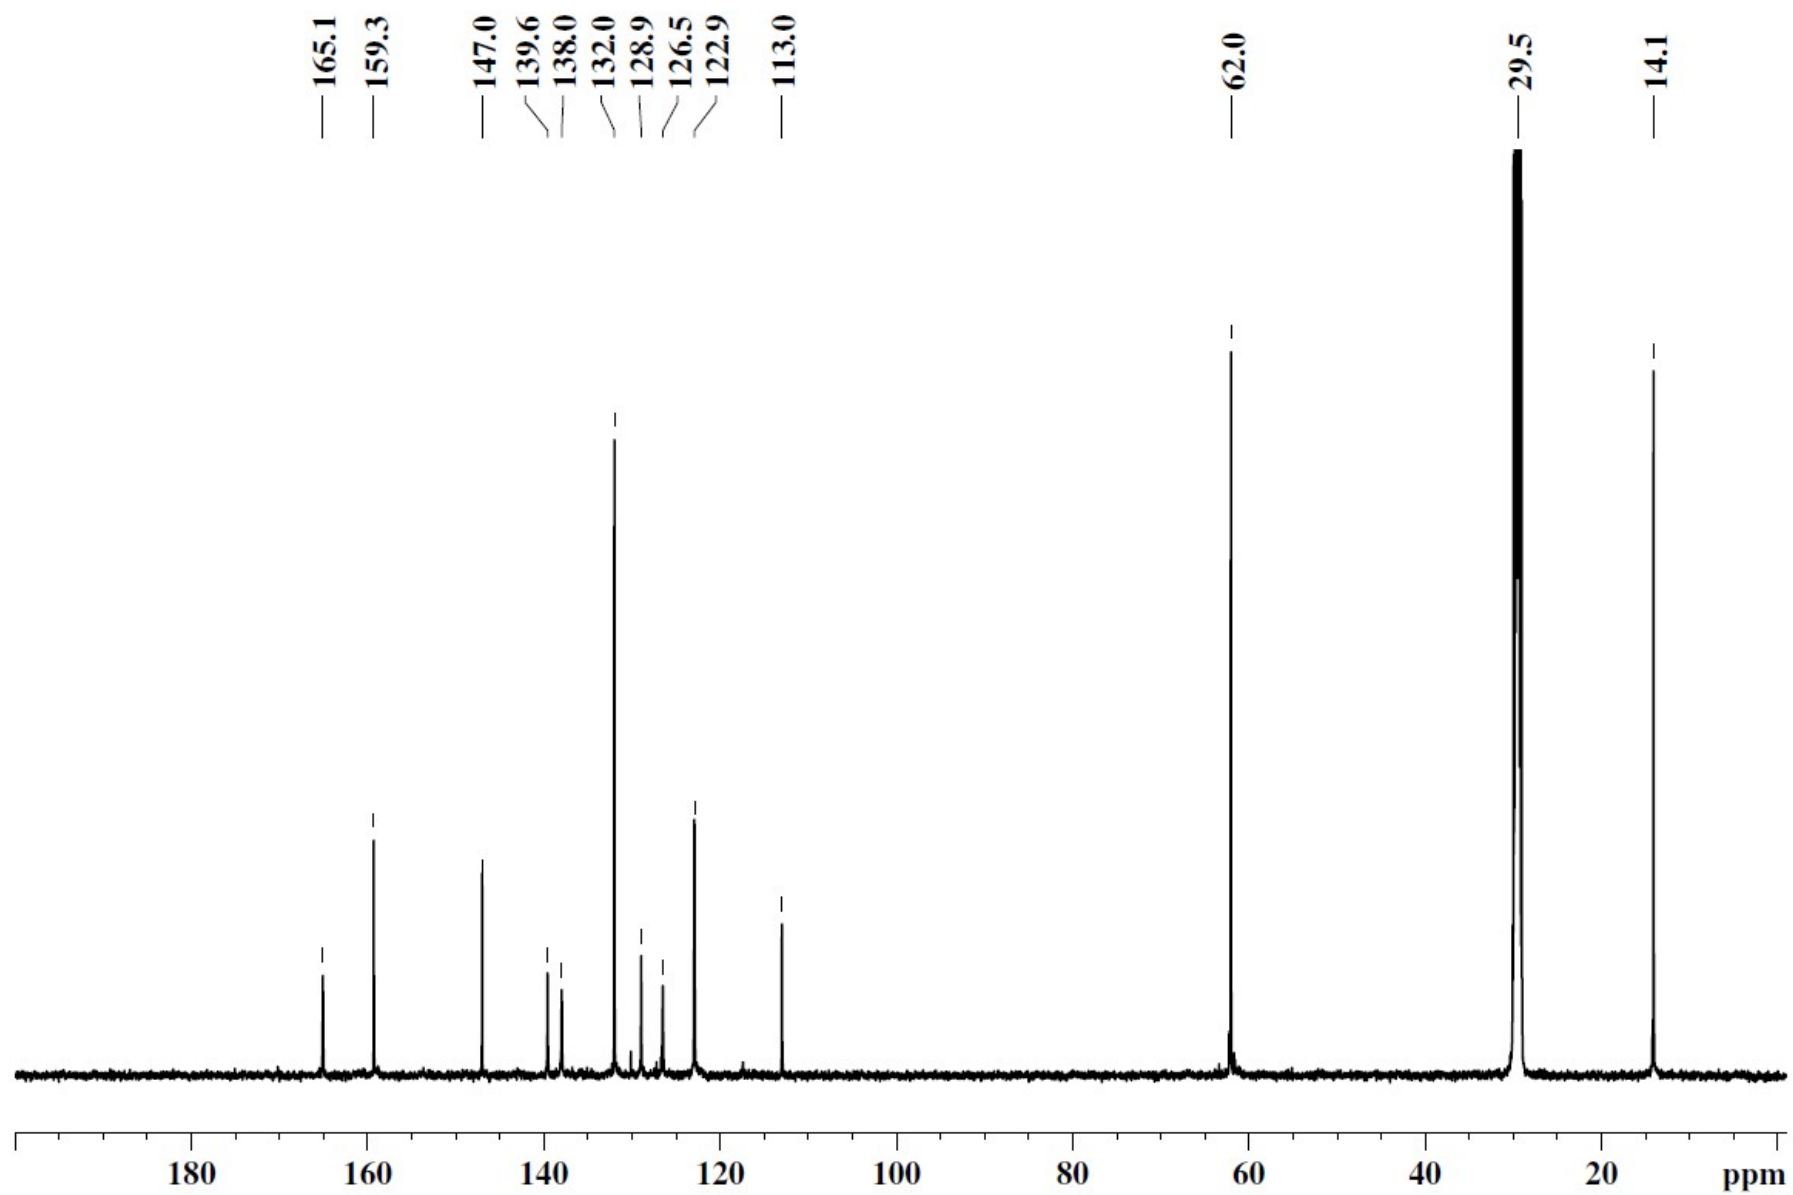

**Figure S6.**  $^{13}\text{C}\{^1\text{H}\}$  NMR (acetone- $\text{d}_6$ , 126 MHz, 303 K) of compound **3c**.

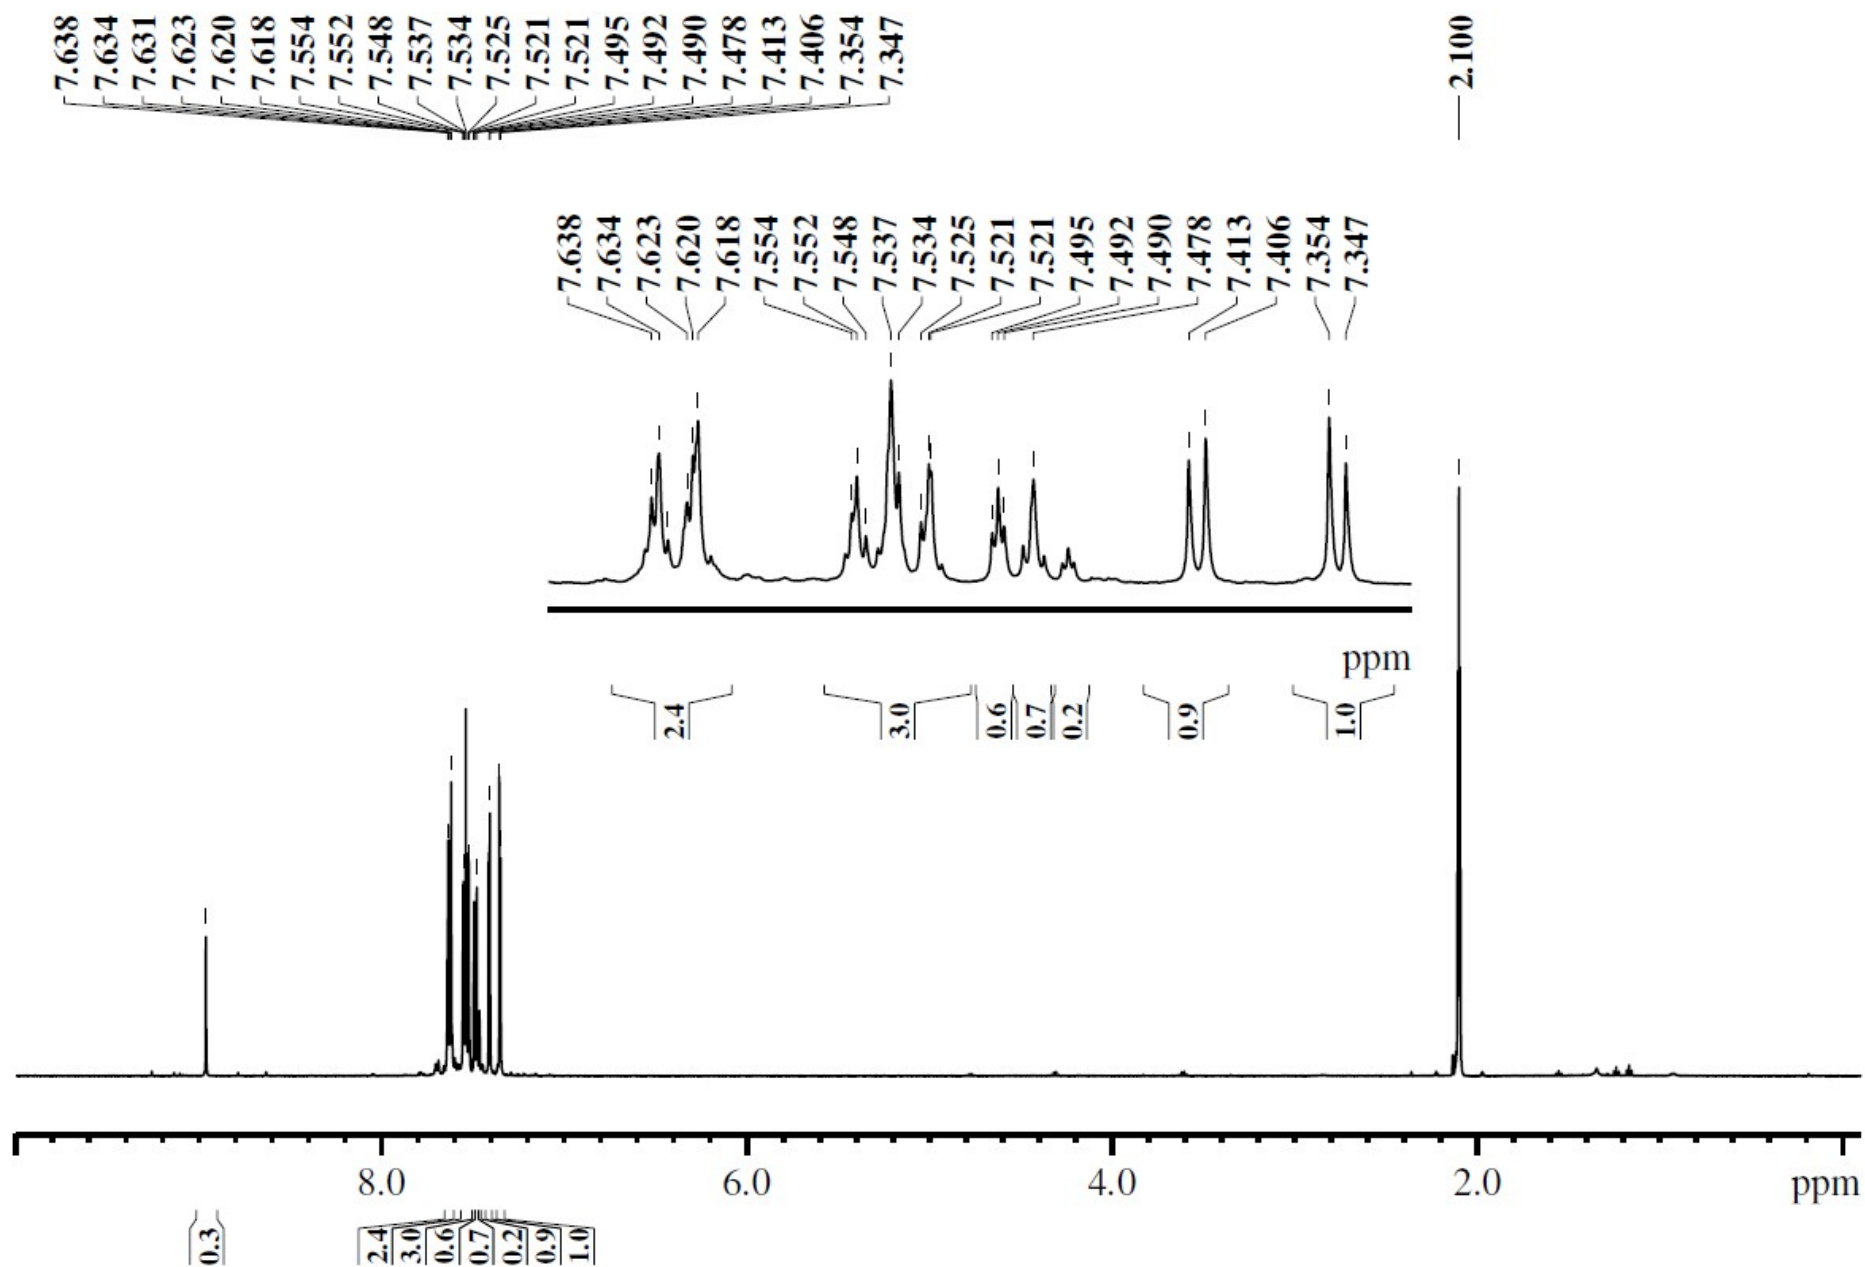

**Figure S7.**  $^1\text{H}$  NMR (acetone- $\text{d}_6$ , 500 MHz, 303 K) of compound **3d**.



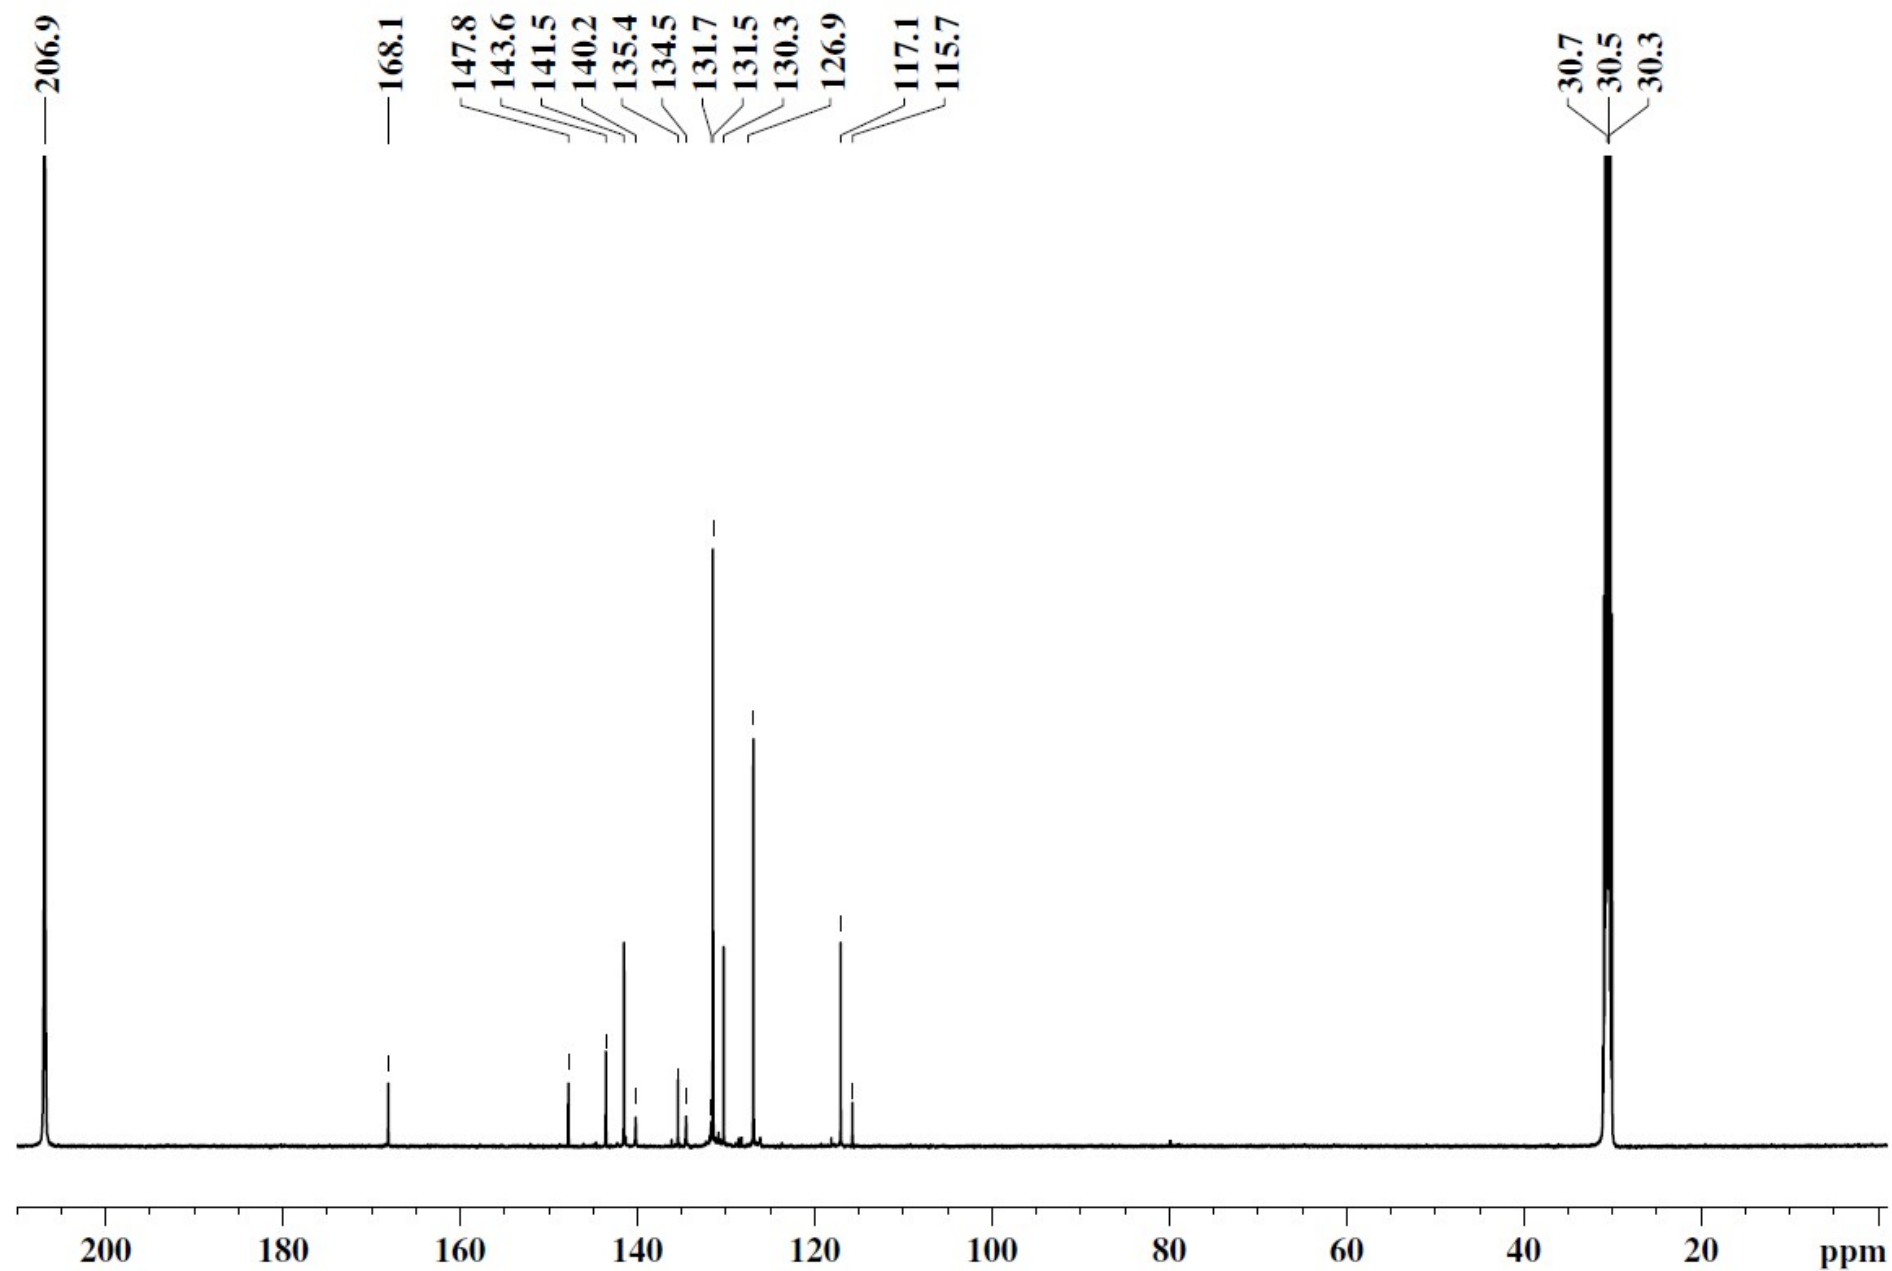

**Figure S8.** <sup>13</sup>C{<sup>1</sup>H} NMR (acetone-d<sub>6</sub>, 126 MHz, 303 K) of compound **3d**.

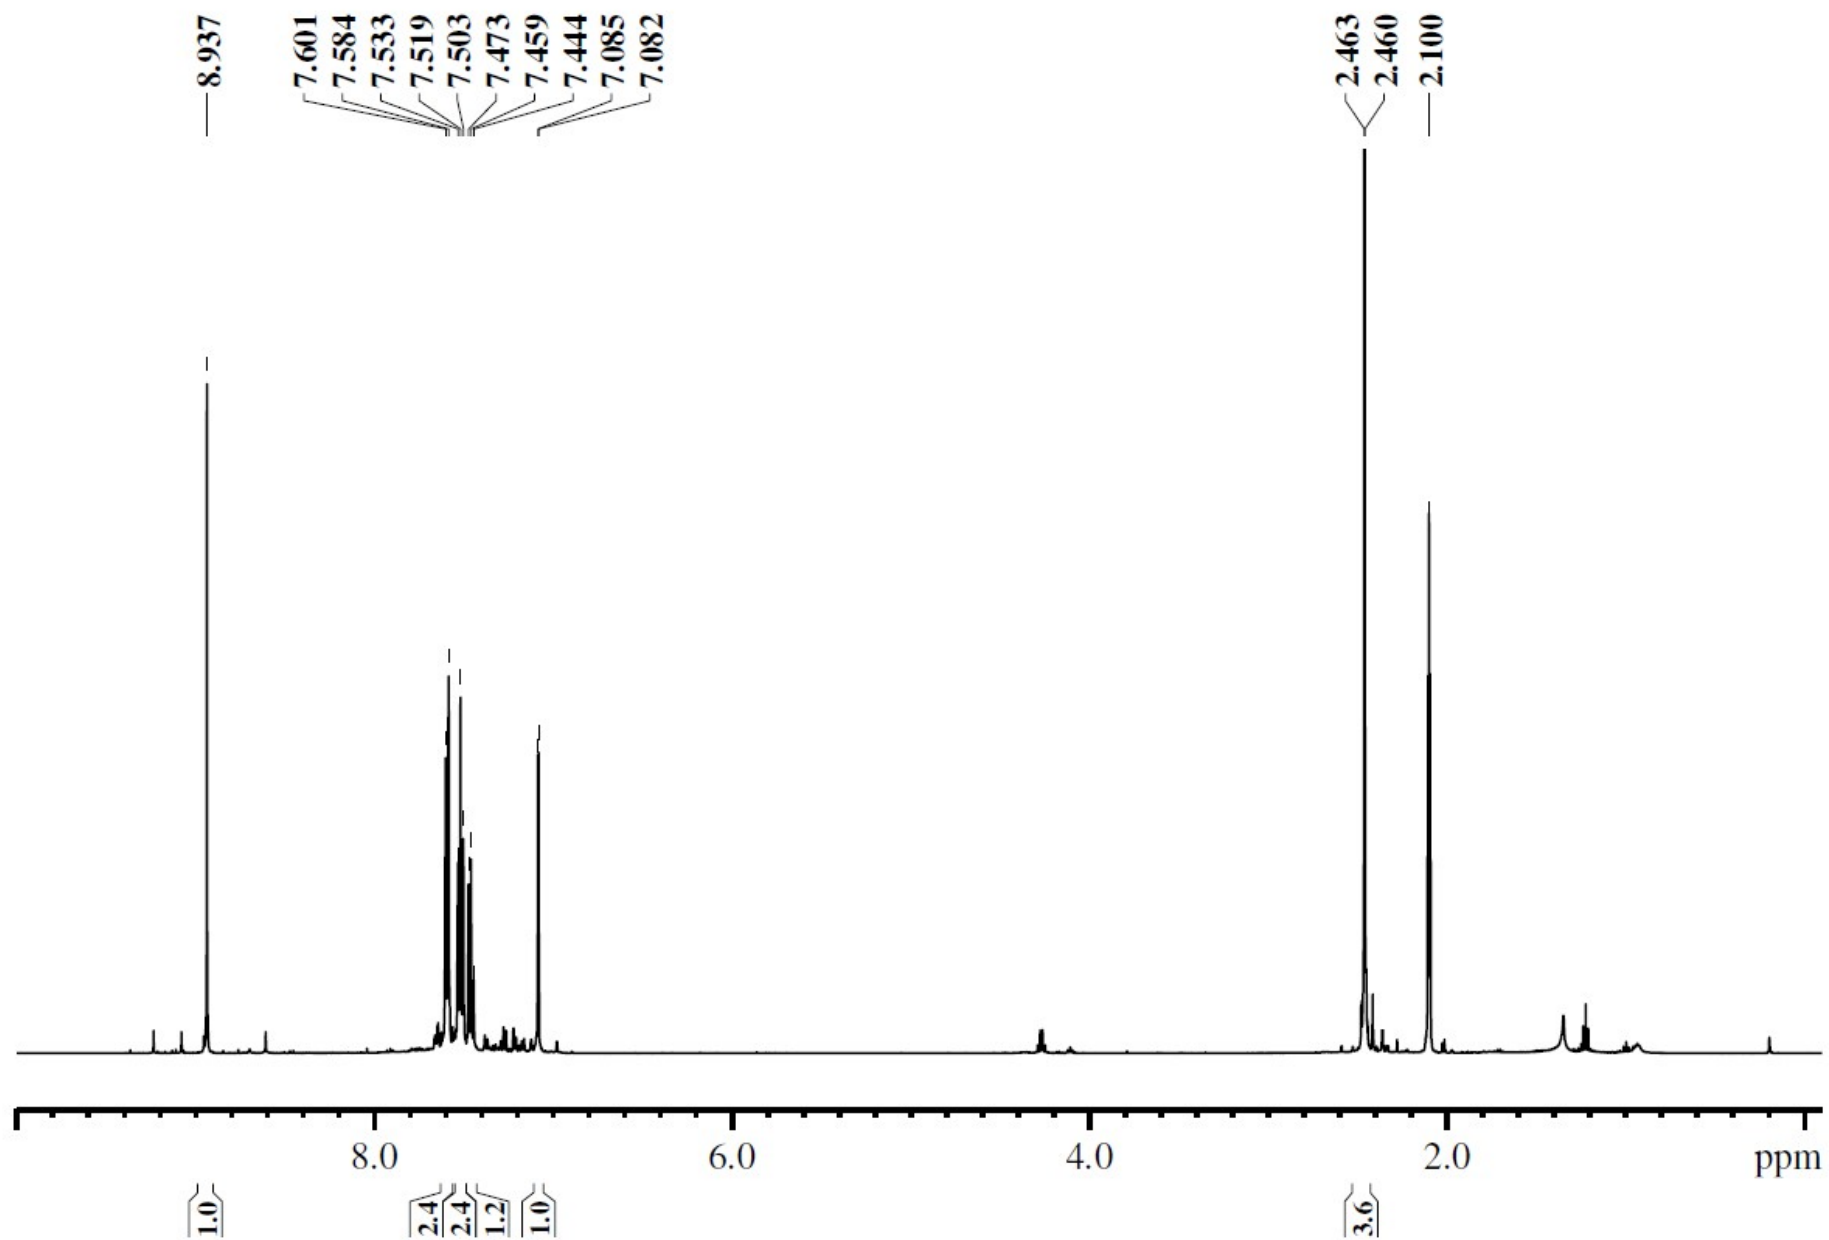

**Figure S9.**  $^1\text{H}$  NMR (acetone- $\text{d}_6$ , 500 MHz, 303 K) of compound **3e**.

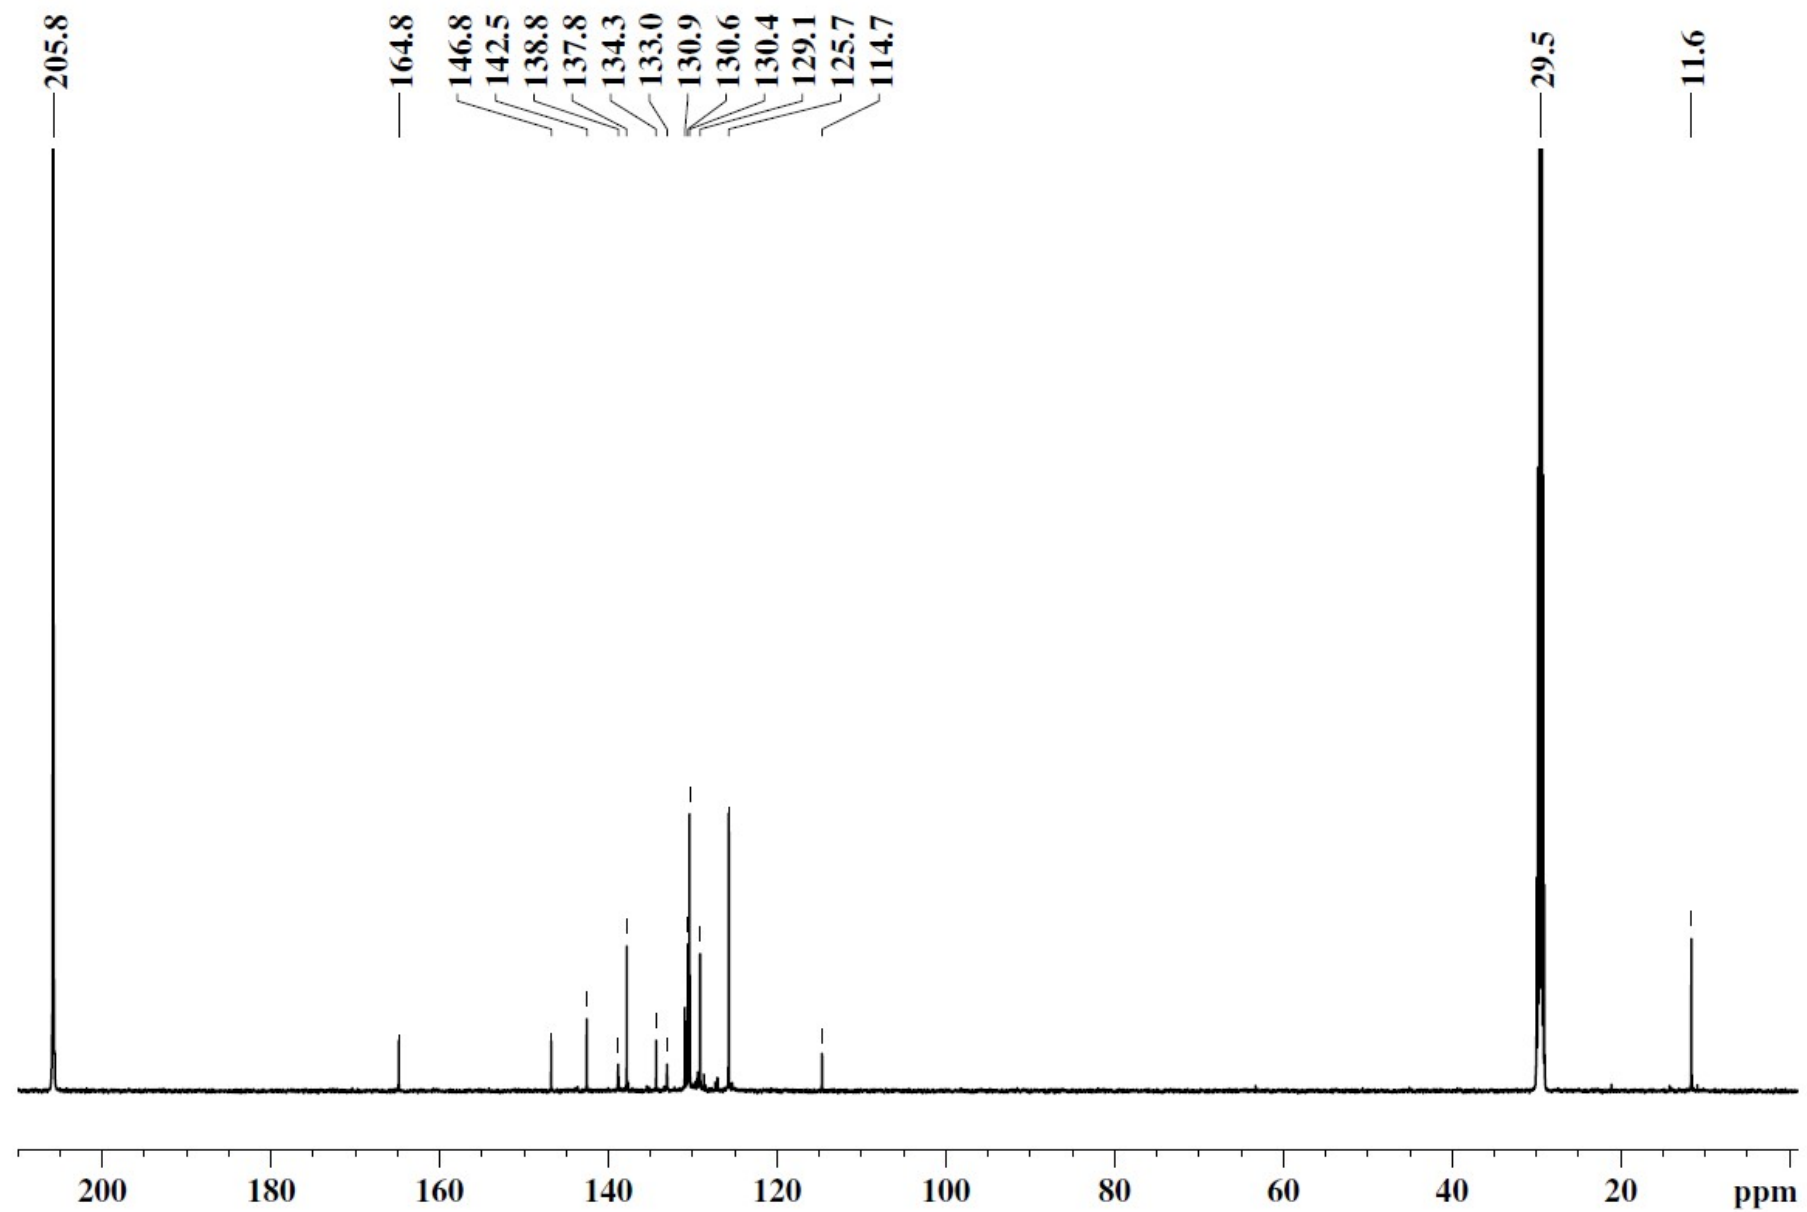

**Figure S10.**  $^{13}\text{C}\{^1\text{H}\}$  NMR (acetone- $\text{d}_6$ , 126 MHz, 303 K) of compound **3e**.

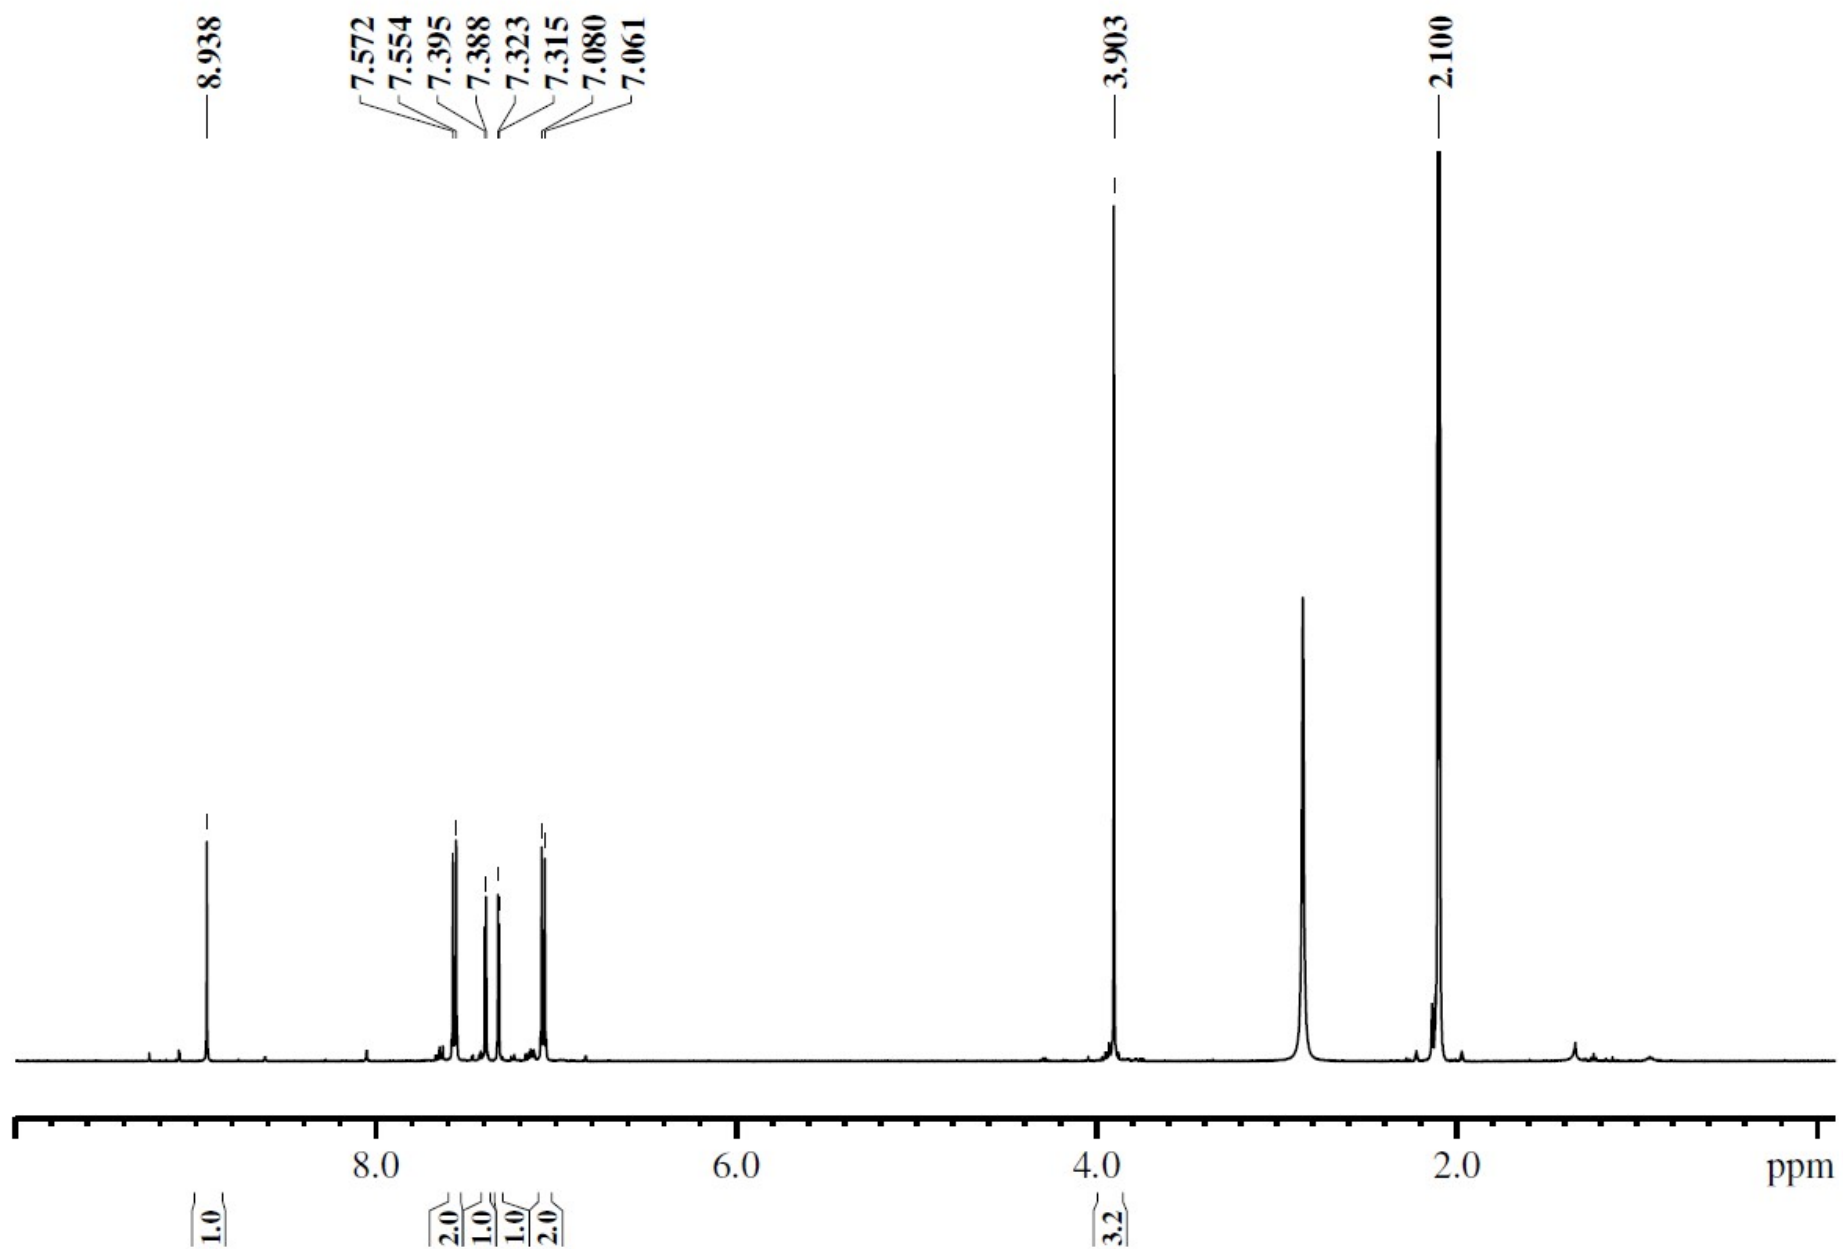

**Figure S11.** <sup>1</sup>H NMR (acetone-d<sub>6</sub>, 500 MHz, 303 K) of compound **3f**.

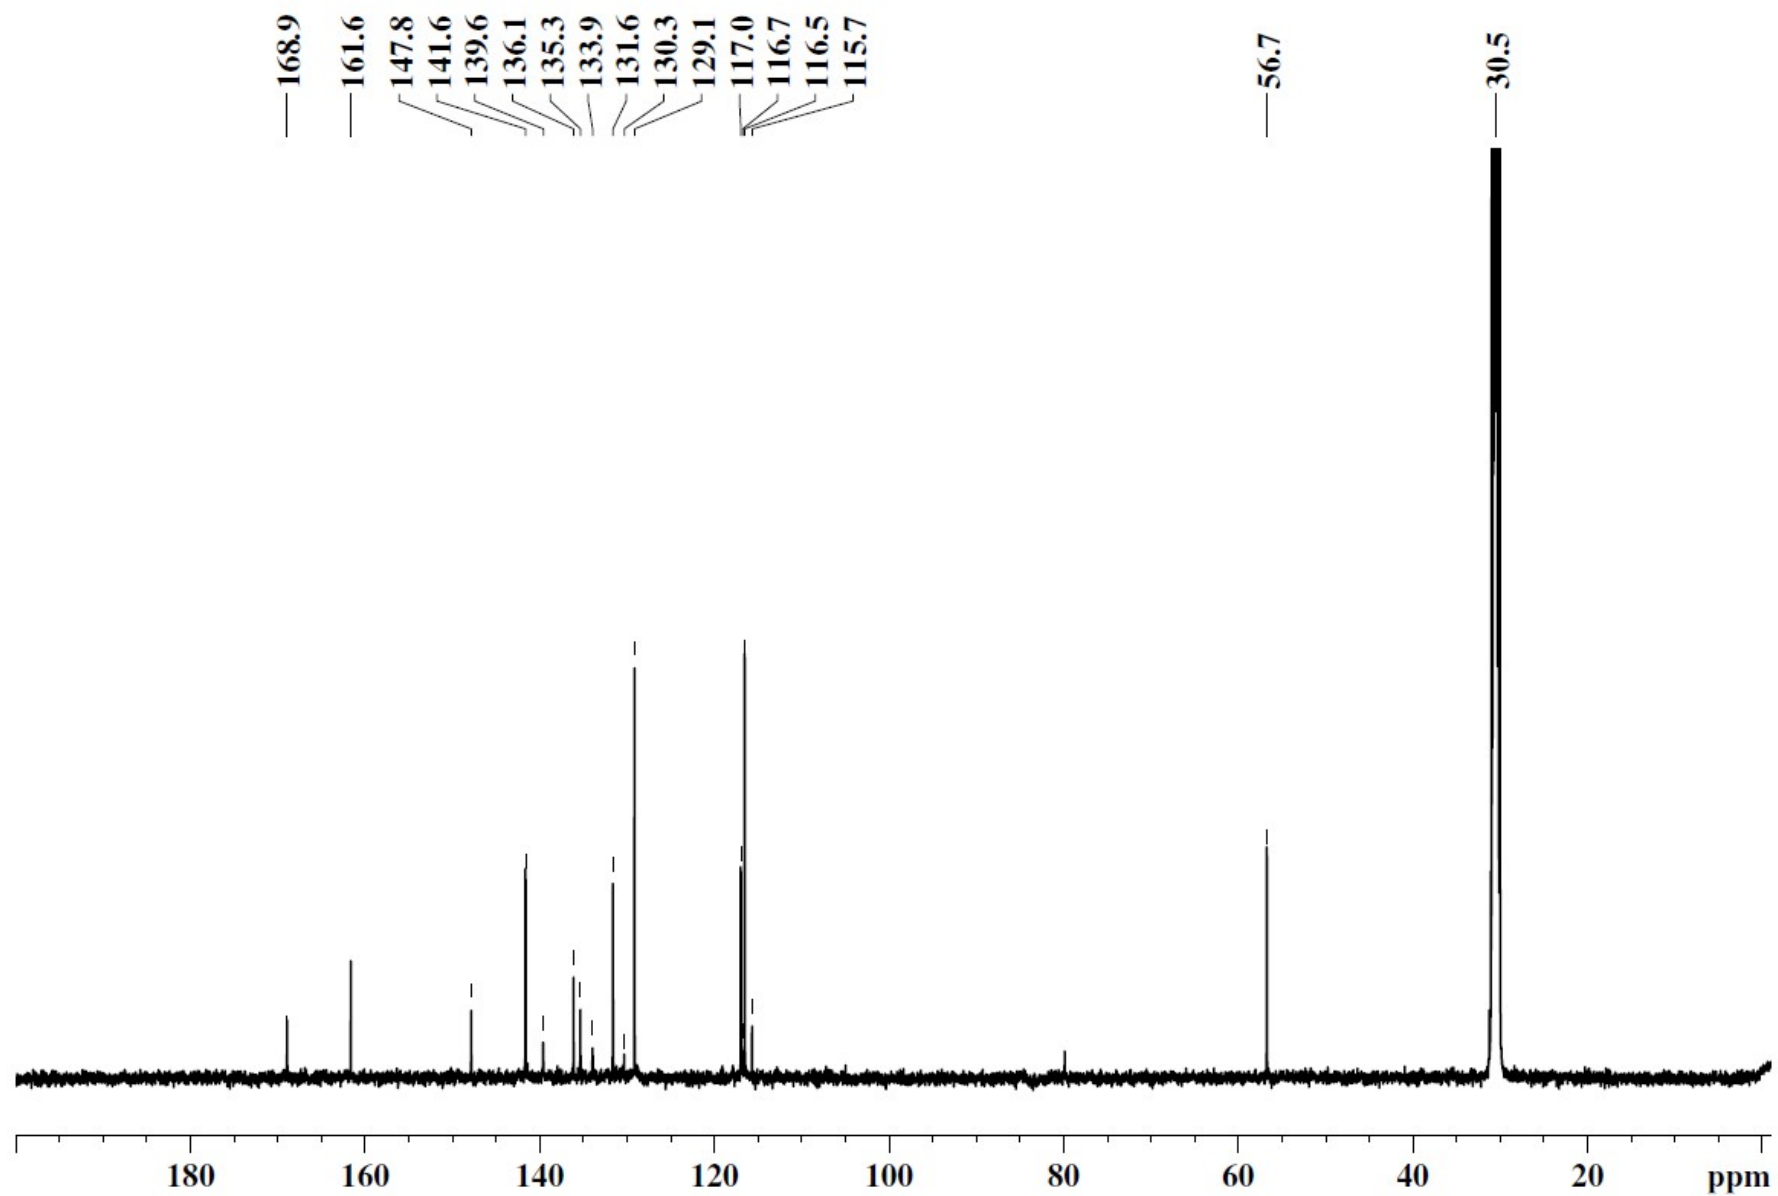

**Figure S12.**  $^{13}\text{C}\{^1\text{H}\}$  NMR (acetone- $\text{d}_6$ , 126 MHz, 303 K) of compound **3f**.

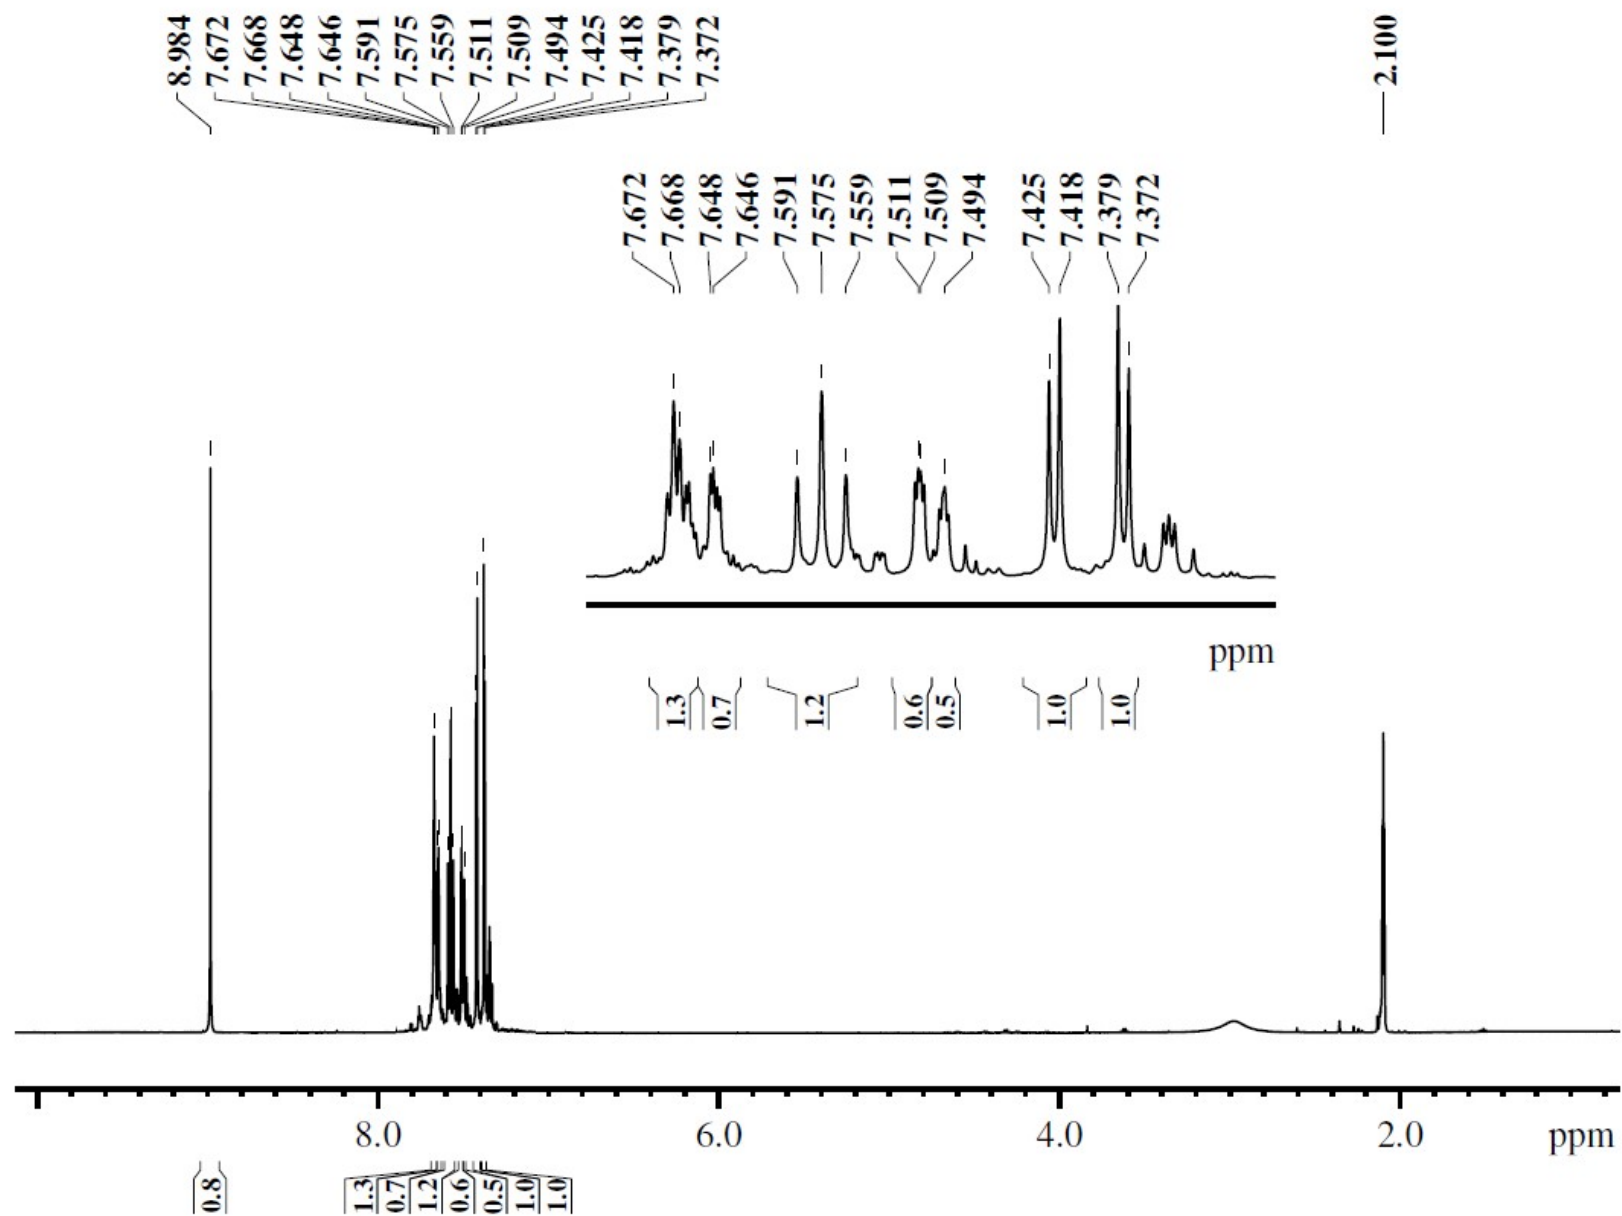

**Figure S13.** <sup>1</sup>H NMR (acetone-d<sub>6</sub>, 500 MHz, 303 K) of compound **3g**.

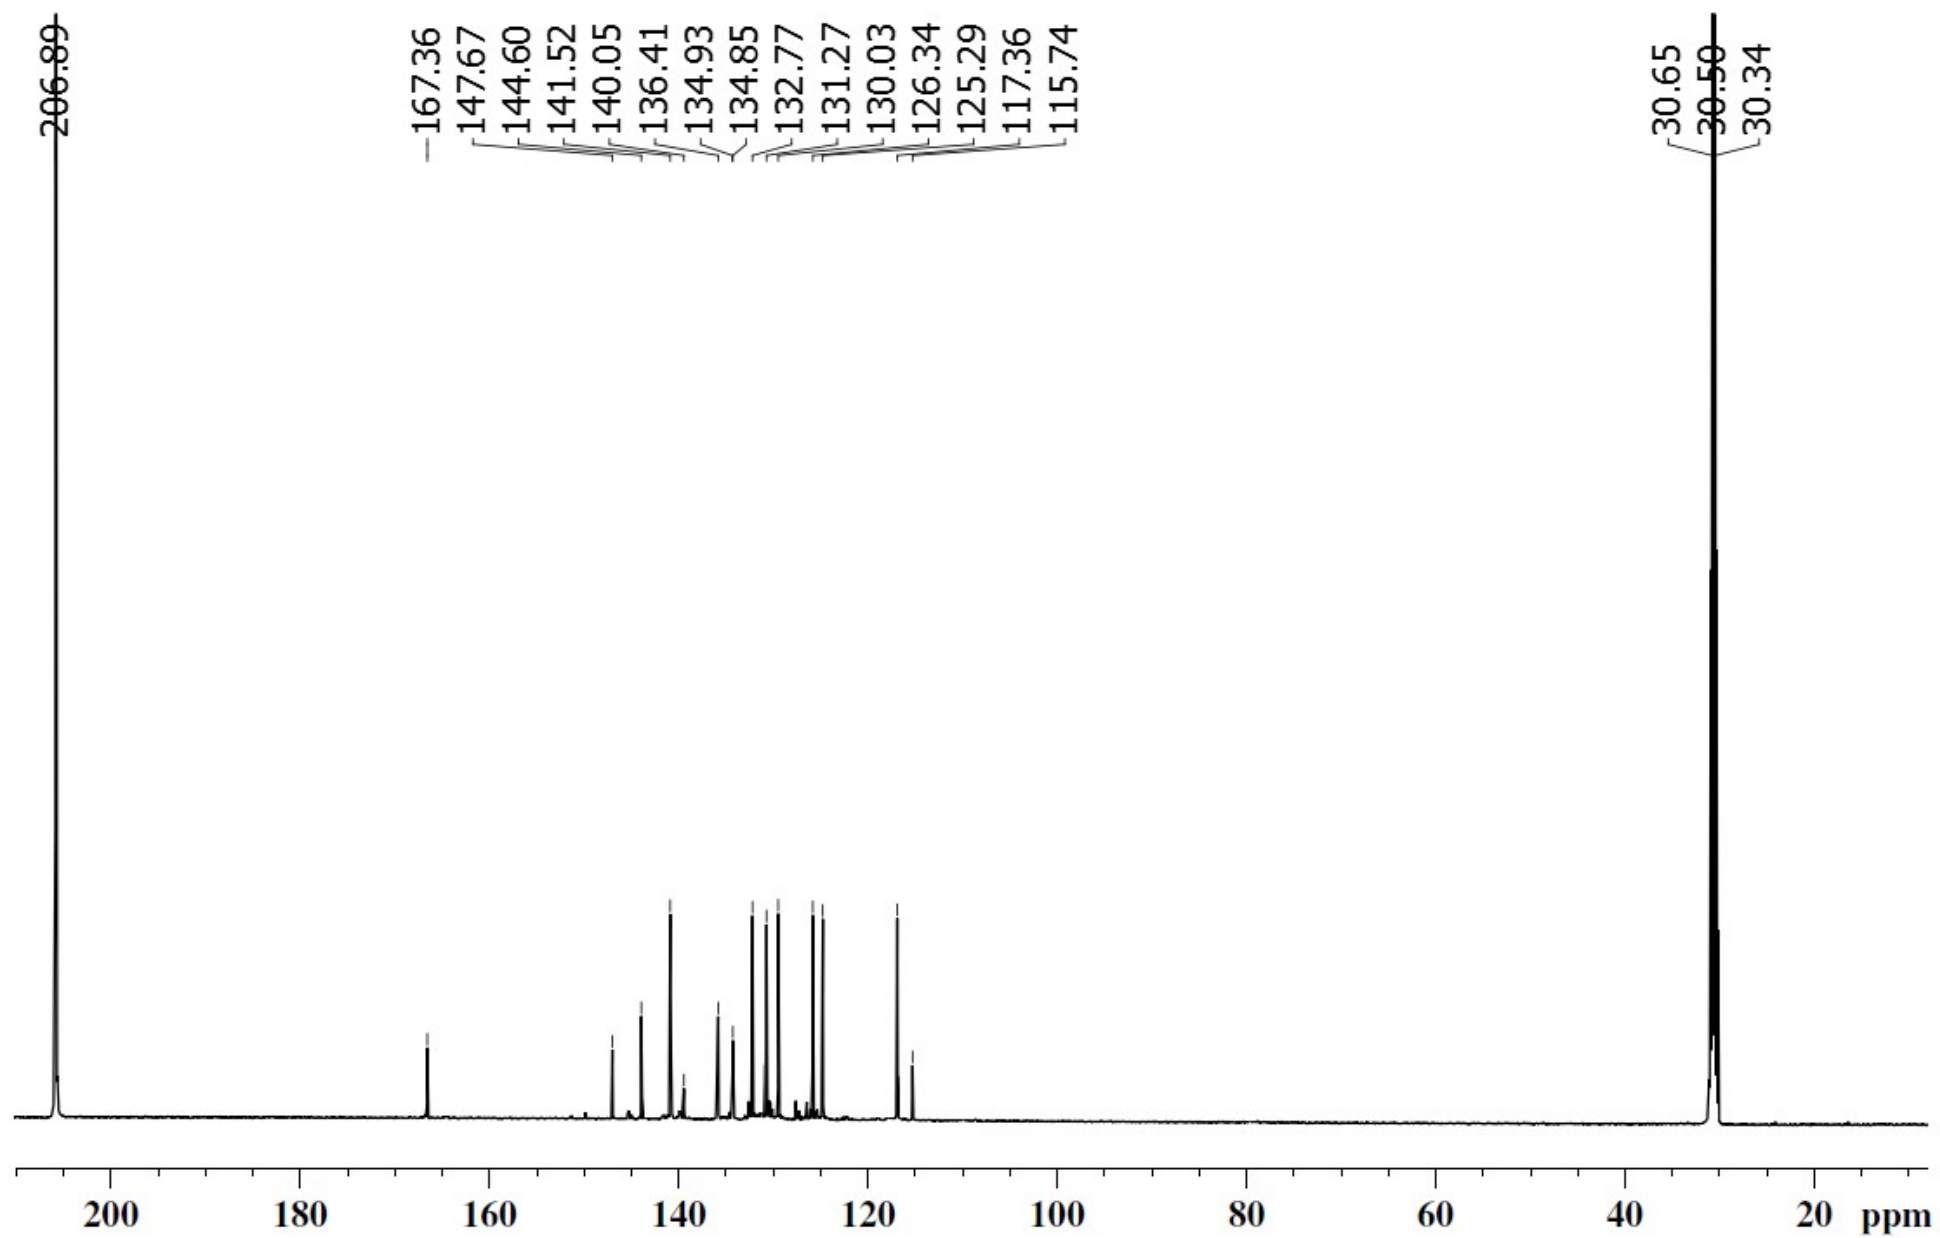

**Figure S14.**  $^{13}\text{C}\{^1\text{H}\}$  NMR (acetone- $\text{d}_6$ , 126 MHz, 303 K) of compound **3g**.

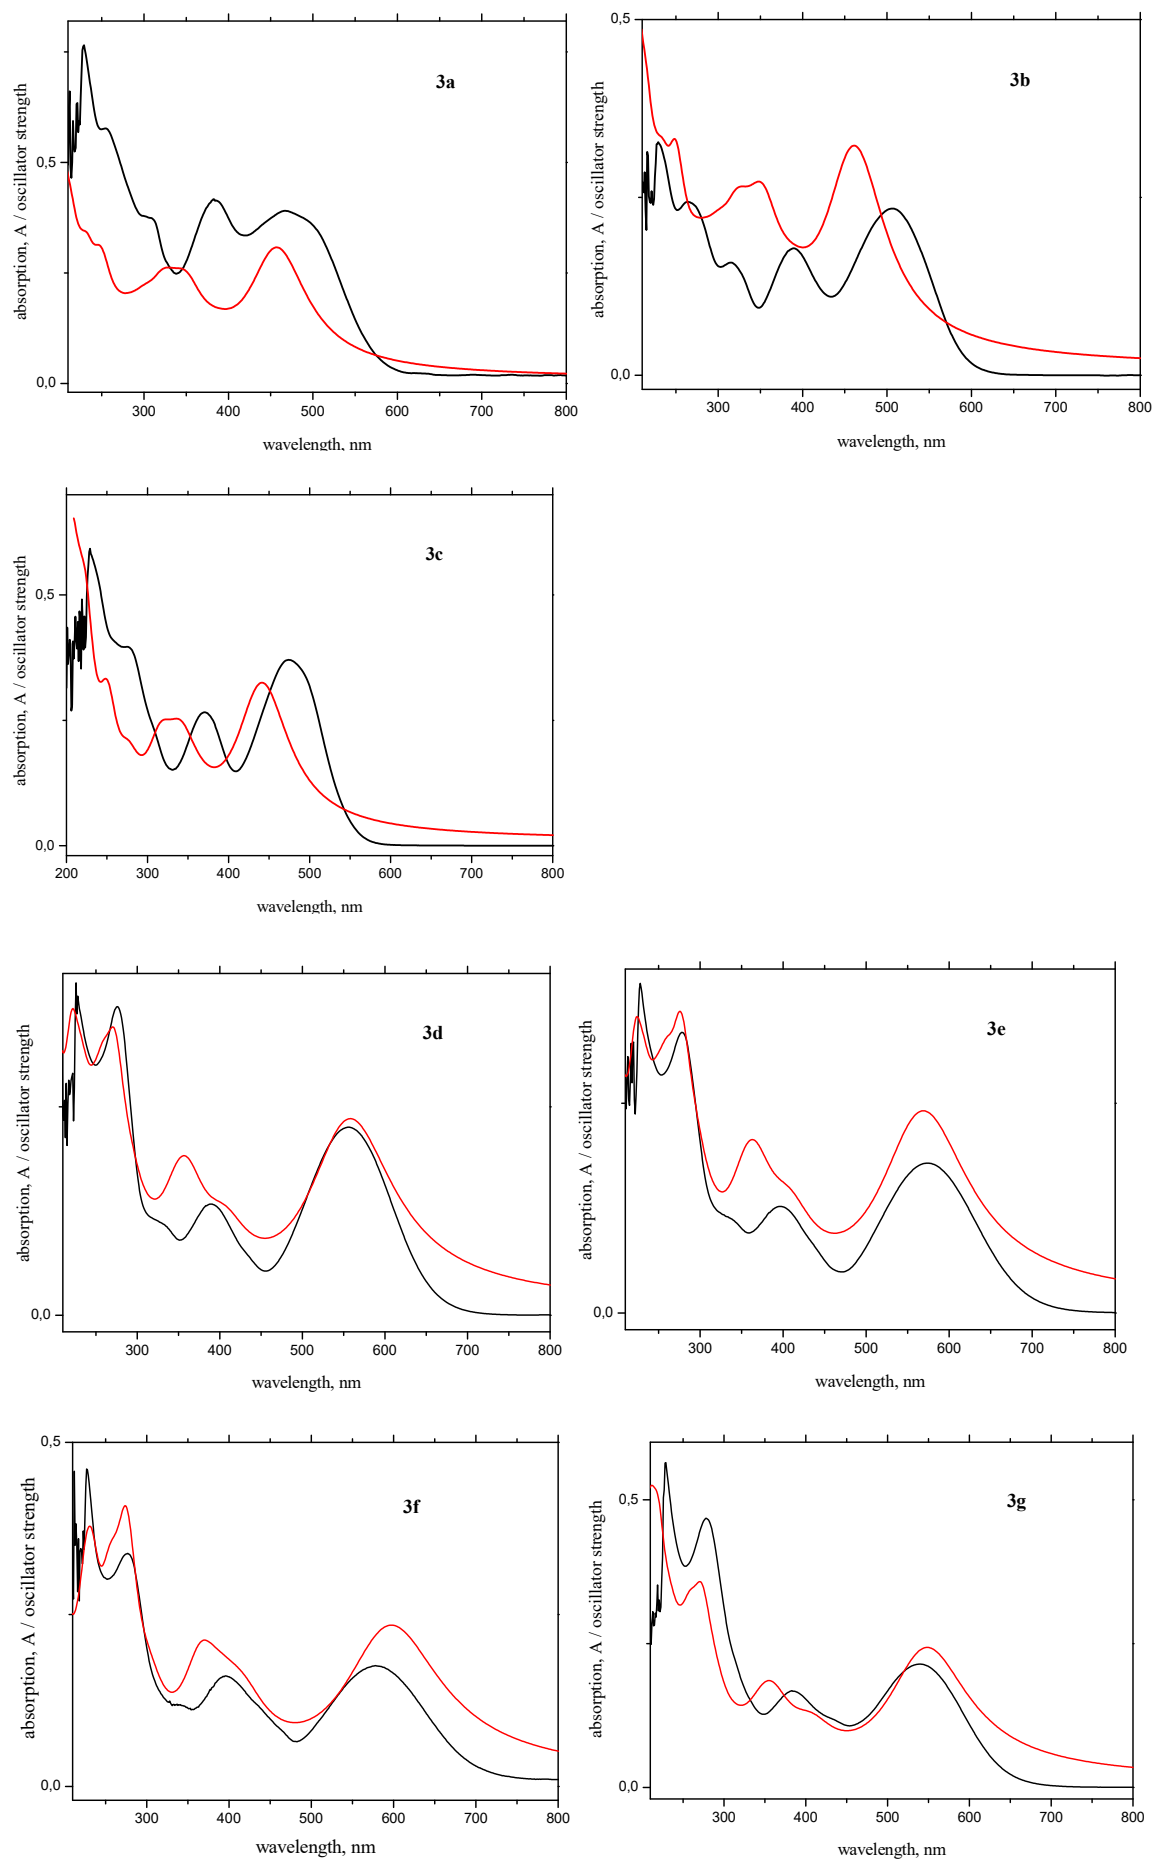

**Figure S15.** Experimental (black) vs theoretical (red) UV/Vis spectra of **3a – 3g**.



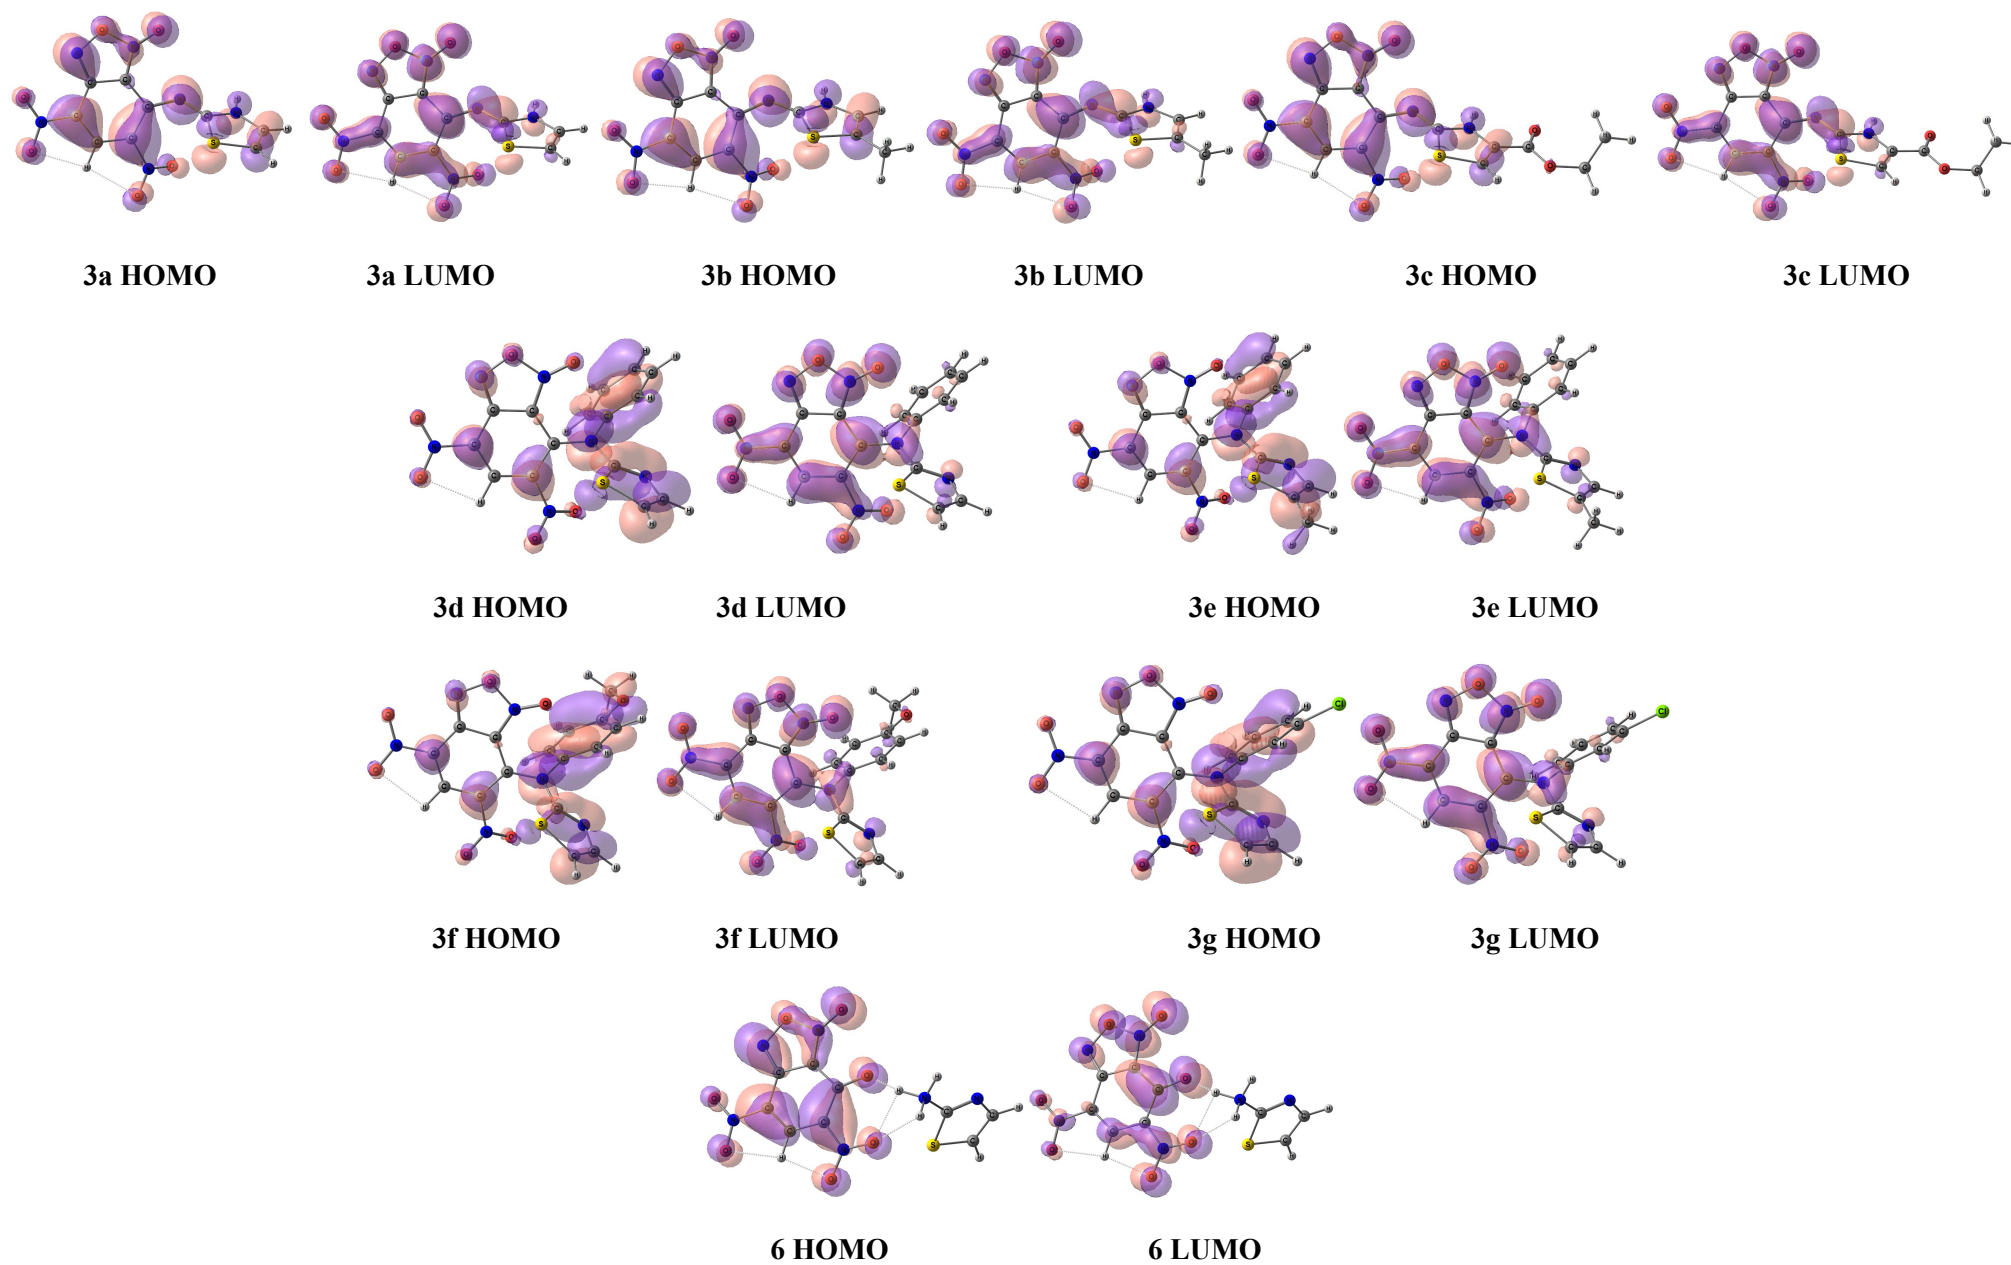

**Figure S16.** Frontier orbitals of **3a** – **3g** and **6**.

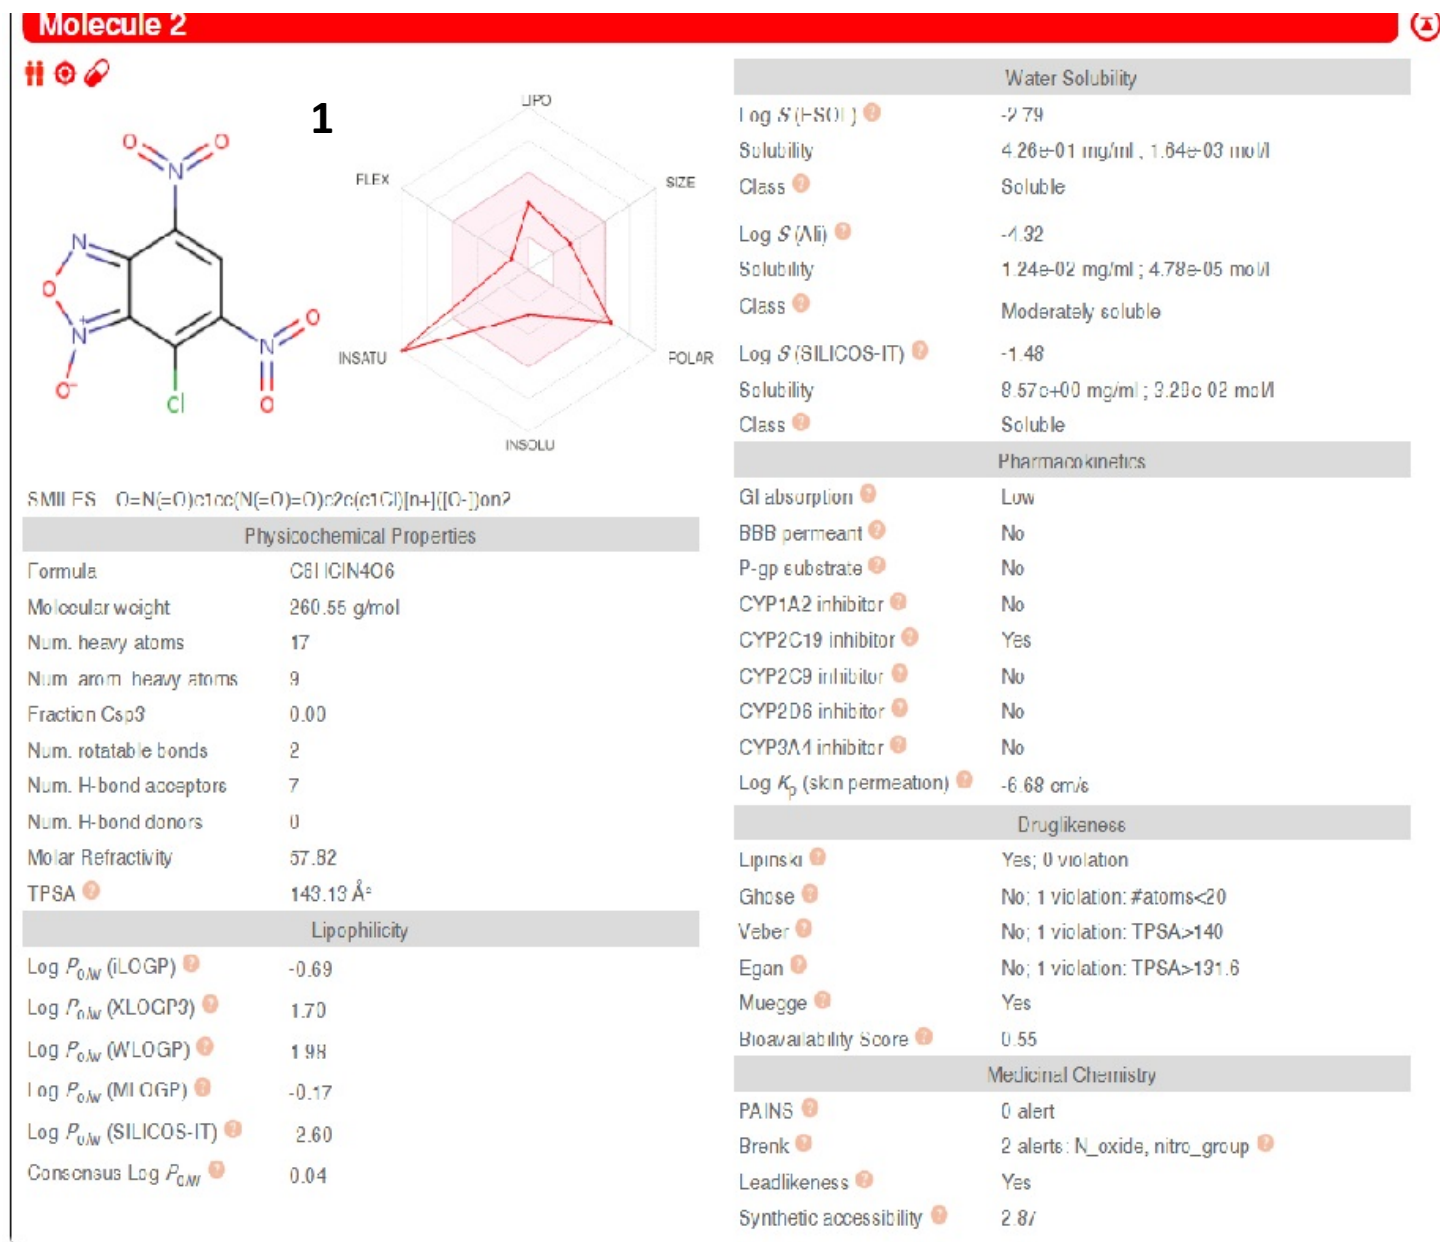

**Figure S17.** ADMET prediction for compound 1

# Molecule 3

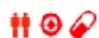

3a

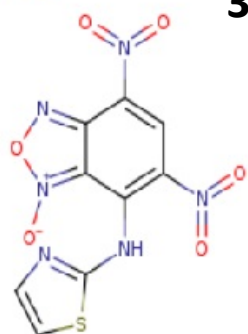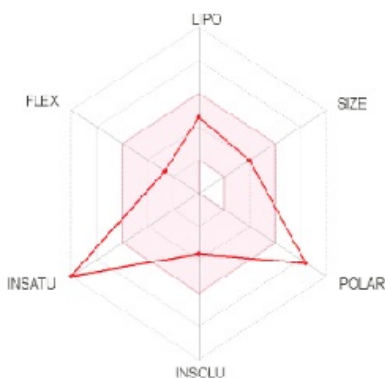

SMILES O=[N+]([O-])c1cc(N(=O)=O)c2c(c1Nc1ncsc1)[n+][O-]on2

## Physicochemical Properties

|                        |              |
|------------------------|--------------|
| Formula                | C9H4N6O6S    |
| Molecular weight       | 324.23 g/mol |
| Num. heavy atoms       | 22           |
| Num. arom. heavy atoms | 14           |
| Fraction Csp3          | 0.00         |
| Num. rotatable bonds   | 4            |
| Num. H-bond acceptors  | 8            |
| Num. H-bond donors     | 1            |
| Molar Refractivity     | 78.03        |
| TPSA <sup>1</sup>      | 196.29 Å²    |

## Lipophilicity

|                                        |       |
|----------------------------------------|-------|
| Log $P_{OW}$ (iLOGP) <sup>2</sup>      | 0.64  |
| Log $P_{OW}$ (XLOGP3) <sup>2</sup>     | 2.53  |
| Log $P_{OW}$ (WLOGP) <sup>2</sup>      | 2.52  |
| Log $P_{OW}$ (MLOGP) <sup>2</sup>      | 0.54  |
| Log $P_{OW}$ (SILICOS-IT) <sup>2</sup> | -2.52 |
| Consensus Log $P_{OW}$ <sup>2</sup>    | 0.53  |

## Water Solubility

|                                   |                                 |
|-----------------------------------|---------------------------------|
| Log $S$ (ESOL) <sup>3</sup>       | -3.65                           |
| Solubility                        | 7.24e-02 mg/ml ; 2.23e-04 mol/l |
| Class <sup>2</sup>                | Soluble                         |
| Log $S$ (Ali) <sup>2</sup>        | -8.30                           |
| Solubility                        | 1.63e-04 mg/ml ; 5.03e-07 mol/l |
| Class <sup>2</sup>                | Poorly soluble                  |
| Log $S$ (SILICOS-IT) <sup>2</sup> | -2.31                           |
| Solubility                        | 1.60e+00 mg/ml ; 4.94e-03 mol/l |
| Class <sup>2</sup>                | Soluble                         |

## Pharmacokinetics

|                                          |            |
|------------------------------------------|------------|
| GI absorption <sup>2</sup>               | Low        |
| BBB permeant <sup>2</sup>                | No         |
| P-gp substrate <sup>2</sup>              | Yes        |
| CYP1A2 inhibitor <sup>2</sup>            | No         |
| CYP2C19 inhibitor <sup>2</sup>           | Yes        |
| CYP2C9 inhibitor <sup>2</sup>            | No         |
| CYP2D6 inhibitor <sup>2</sup>            | No         |
| CYP3A4 inhibitor <sup>2</sup>            | No         |
| Log $K_p$ (skin permeation) <sup>2</sup> | -8.48 cm/s |

## Druglikeness

|                                    |                             |
|------------------------------------|-----------------------------|
| Lipinski <sup>2</sup>              | Yes; 1 violation: NcrO>10   |
| Ghose <sup>2</sup>                 | Yes                         |
| Veber <sup>2</sup>                 | No; 1 violation: TPSA>140   |
| Egan <sup>2</sup>                  | No; 1 violation: TPSA>131.0 |
| Muegge <sup>2</sup>                | No; 1 violation: TPSA>150   |
| Bioavailability Score <sup>2</sup> | 0.55                        |

## Medicinal Chemistry

|                                      |                                             |
|--------------------------------------|---------------------------------------------|
| PAINS <sup>2</sup>                   | 0 alert                                     |
| Brenk <sup>2</sup>                   | 2 alerts: N_oxide, nitro_group <sup>2</sup> |
| Leadlikeness <sup>2</sup>            | Yes                                         |
| Synthetic accessibility <sup>2</sup> | 3.26                                        |

**Figure S18.** ADMET prediction for compound **3a**

## Molecule 4

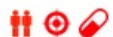

**3b**

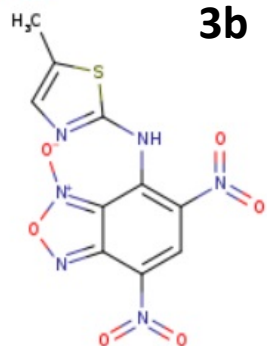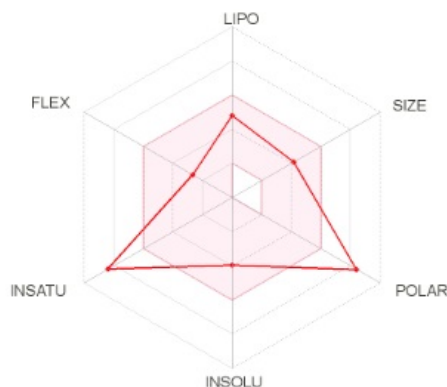

SMILES Cc1cnc(s1)Nc1c(cc(c2c1[n+](O-))n2)N(=O)=O)N(=O)=O

### Physicochemical Properties

|                        |              |
|------------------------|--------------|
| Formula                | C10H6N6O6S   |
| Molecular weight       | 338.26 g/mol |
| Num. heavy atoms       | 23           |
| Num. arom. heavy atoms | 14           |
| Fraction Csp3          | 0.10         |
| Num. rotatable bonds   | 4            |
| Num. H-bond acceptors  | 8            |
| Num. H-bond donors     | 1            |
| Molar Refractivity     | 83.00        |
| TPSA <sup>?</sup>      | 196.29 Å²    |

### Lipophilicity

|                                        |       |
|----------------------------------------|-------|
| Log $P_{ow}$ (iLOGP) <sup>?</sup>      | 0.99  |
| Log $P_{ow}$ (XLOGP3) <sup>?</sup>     | 2.93  |
| Log $P_{ow}$ (WLOGP) <sup>?</sup>      | 2.83  |
| Log $P_{ow}$ (MLOGP) <sup>?</sup>      | -0.24 |
| Log $P_{ow}$ (SILICOS-IT) <sup>?</sup> | -2.07 |
| Consensus Log $P_{ow}$ <sup>?</sup>    | 0.89  |

### Water Solubility

|                                   |                                 |
|-----------------------------------|---------------------------------|
| Log $S$ (ESOL) <sup>?</sup>       | -3.97                           |
| Solubility                        | 3.63e-02 mg/ml ; 1.07e-04 mol/l |
| Class <sup>?</sup>                | Soluble                         |
| Log $S$ (Ali) <sup>?</sup>        | -6.71                           |
| Solubility                        | 6.54e-05 mg/ml ; 1.93e-07 mol/l |
| Class <sup>?</sup>                | Poorly soluble                  |
| Log $S$ (SILICOS-IT) <sup>?</sup> | -2.69                           |
| Solubility                        | 6.99e-01 mg/ml ; 2.07e-03 mol/l |
| Class <sup>?</sup>                | Soluble                         |

### Pharmacokinetics

|                                          |            |
|------------------------------------------|------------|
| GI absorption <sup>?</sup>               | Low        |
| BBB permeant <sup>?</sup>                | No         |
| P-gp substrate <sup>?</sup>              | Yes        |
| CYP1A2 inhibitor <sup>?</sup>            | No         |
| CYP2C19 inhibitor <sup>?</sup>           | Yes        |
| CYP2C9 inhibitor <sup>?</sup>            | No         |
| CYP2D6 inhibitor <sup>?</sup>            | No         |
| CYP3A4 inhibitor <sup>?</sup>            | No         |
| Log $K_p$ (skin permeation) <sup>?</sup> | -6.28 cm/s |

### Druglikeness

|                                    |                             |
|------------------------------------|-----------------------------|
| Lipinski <sup>?</sup>              | Yes; 1 violation: NorO>10   |
| Ghose <sup>?</sup>                 | Yes                         |
| Veber <sup>?</sup>                 | No; 1 violation: TPSA>140   |
| Egan <sup>?</sup>                  | No; 1 violation: TPSA>131.6 |
| Muegge <sup>?</sup>                | No; 1 violation: TPSA>150   |
| Bioavailability Score <sup>?</sup> | 0.55                        |

### Medicinal Chemistry

|                                      |                                             |
|--------------------------------------|---------------------------------------------|
| PAINS <sup>?</sup>                   | 0 alert                                     |
| Brenk <sup>?</sup>                   | 2 alerts: N_oxide, nitro_group <sup>?</sup> |
| Leadlikeness <sup>?</sup>            | Yes                                         |
| Synthetic accessibility <sup>?</sup> | 3.33                                        |

**Figure S19.** ADMET prediction for compound **3b**



## Molecule 5

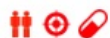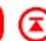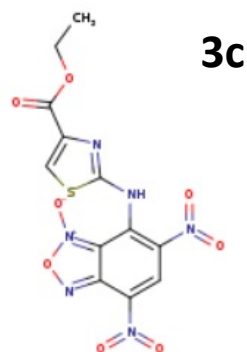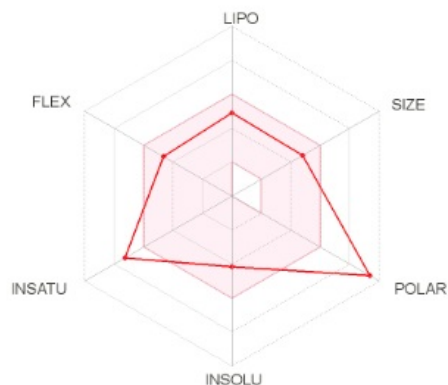

SMILES CCOC(=O)c1csc(n1)Nc1c(cc(c2c1[n+](O-)]n2)N(=O)=O)N(=O)=O

### Physicochemical Properties

|                           |                                                                |
|---------------------------|----------------------------------------------------------------|
| Formula                   | C <sub>12</sub> H <sub>8</sub> N <sub>6</sub> O <sub>8</sub> S |
| Molecular weight          | 396.29 g/mol                                                   |
| Num. heavy atoms          | 27                                                             |
| Num. arom. heavy atoms    | 14                                                             |
| Fraction Csp <sup>3</sup> | 0.17                                                           |
| Num. rotatable bonds      | 7                                                              |
| Num. H-bond acceptors     | 10                                                             |
| Num. H-bond donors        | 1                                                              |
| Molar Refractivity        | 94.12                                                          |
| TPSA <sup>?</sup>         | 222.59 Å <sup>2</sup>                                          |

### Lipophilicity

|                                                      |       |
|------------------------------------------------------|-------|
| Log <i>P</i> <sub>ow</sub> (iLOGP) <sup>?</sup>      | 1.12  |
| Log <i>P</i> <sub>ow</sub> (XLOGP3) <sup>?</sup>     | 3.08  |
| Log <i>P</i> <sub>ow</sub> (WLOGP) <sup>?</sup>      | 2.70  |
| Log <i>P</i> <sub>ow</sub> (MLOGP) <sup>?</sup>      | -0.15 |
| Log <i>P</i> <sub>ow</sub> (SILICOS-IT) <sup>?</sup> | -2.25 |
| Consensus Log <i>P</i> <sub>ow</sub> <sup>?</sup>    | 0.90  |

### Water Solubility

|                                        |                                 |
|----------------------------------------|---------------------------------|
| Log <i>S</i> (ESOL) <sup>?</sup>       | -4.16                           |
| Solubility                             | 2.75e-02 mg/ml ; 6.93e-05 mol/l |
| Class <sup>?</sup>                     | Moderately soluble              |
| Log <i>S</i> (Ali) <sup>?</sup>        | -7.42                           |
| Solubility                             | 1.50e-05 mg/ml ; 3.79e-08 mol/l |
| Class <sup>?</sup>                     | Poorly soluble                  |
| Log <i>S</i> (SILICOS-IT) <sup>?</sup> | -2.74                           |
| Solubility                             | 7.28e-01 mg/ml ; 1.84e-03 mol/l |
| Class <sup>?</sup>                     | Soluble                         |

### Pharmacokinetics

|                                                          |            |
|----------------------------------------------------------|------------|
| GI absorption <sup>?</sup>                               | Low        |
| BBB permeant <sup>?</sup>                                | No         |
| P-gp substrate <sup>?</sup>                              | Yes        |
| CYP1A2 inhibitor <sup>?</sup>                            | No         |
| CYP2C19 inhibitor <sup>?</sup>                           | Yes        |
| CYP2C9 inhibitor <sup>?</sup>                            | No         |
| CYP2D6 inhibitor <sup>?</sup>                            | No         |
| CYP3A4 inhibitor <sup>?</sup>                            | Yes        |
| Log <i>K</i> <sub>p</sub> (skin permeation) <sup>?</sup> | -6.53 cm/s |

### Druglikeness

|                                    |                             |
|------------------------------------|-----------------------------|
| Lipinski <sup>?</sup>              | Yes; 1 violation: NorO>10   |
| Ghose <sup>?</sup>                 | Yes                         |
| Veber <sup>?</sup>                 | No; 1 violation: TPSA>140   |
| Egan <sup>?</sup>                  | No; 1 violation: TPSA>131.6 |
| Muegge <sup>?</sup>                | No; 1 violation: TPSA>150   |
| Bioavailability Score <sup>?</sup> | 0.55                        |

### Medicinal Chemistry

|                                      |                                             |
|--------------------------------------|---------------------------------------------|
| PAINS <sup>?</sup>                   | 0 alert                                     |
| Brenk <sup>?</sup>                   | 2 alerts: N_oxide, nitro_group <sup>?</sup> |
| Leadlikeness <sup>?</sup>            | No; 1 violation: MW>350                     |
| Synthetic accessibility <sup>?</sup> | 3.60                                        |

**Figure S20.** ADMET prediction for compound **3c**

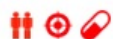

3d

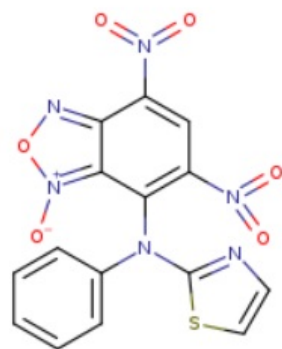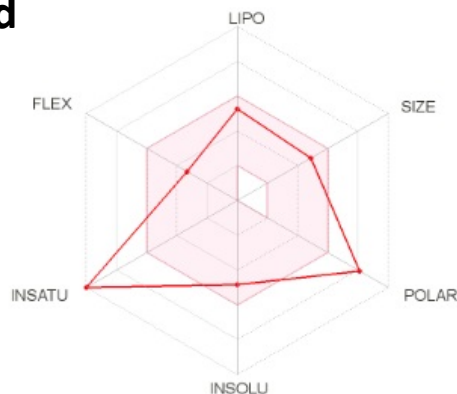

SMILES O=N(=O)c1cc(N(=O)=O)c2c(c1N(c1nccs1)c1ccccc1)[n+][O-]on2

#### Physicochemical Properties

|                           |                                                                |
|---------------------------|----------------------------------------------------------------|
| Formula                   | C <sub>15</sub> H <sub>8</sub> N <sub>6</sub> O <sub>6</sub> S |
| Molecular weight          | 400.33 g/mol                                                   |
| Num. heavy atoms          | 28                                                             |
| Num. arom. heavy atoms    | 20                                                             |
| Fraction Csp <sup>3</sup> | 0.00                                                           |
| Num. rotatable bonds      | 5                                                              |
| Num. H-bond acceptors     | 8                                                              |
| Num. H-bond donors        | 0                                                              |
| Molar Refractivity        | 103.17                                                         |
| TPSA <sup>?</sup>         | 187.50 Å <sup>2</sup>                                          |

#### Lipophilicity

|                                                      |       |
|------------------------------------------------------|-------|
| Log <i>P</i> <sub>ow</sub> (iLOGP) <sup>?</sup>      | 1.26  |
| Log <i>P</i> <sub>ow</sub> (XLOGP3) <sup>?</sup>     | 3.68  |
| Log <i>P</i> <sub>ow</sub> (WLOGP) <sup>?</sup>      | 4.25  |
| Log <i>P</i> <sub>ow</sub> (MLOGP) <sup>?</sup>      | 1.19  |
| Log <i>P</i> <sub>ow</sub> (SILICOS-IT) <sup>?</sup> | -1.75 |
| Consensus Log <i>P</i> <sub>ow</sub> <sup>?</sup>    | 1.73  |

#### Water Solubility

|                                        |                                 |
|----------------------------------------|---------------------------------|
| Log <i>S</i> (ESOL) <sup>?</sup>       | -4.84                           |
| Solubility                             | 5.80e-03 mg/ml ; 1.45e-05 mol/l |
| Class <sup>?</sup>                     | Moderately soluble              |
| Log <i>S</i> (Ali) <sup>?</sup>        | -7.31                           |
| Solubility                             | 1.97e-05 mg/ml ; 4.93e-08 mol/l |
| Class <sup>?</sup>                     | Poorly soluble                  |
| Log <i>S</i> (SILICOS-IT) <sup>?</sup> | -4.05                           |
| Solubility                             | 3.55e-02 mg/ml ; 8.87e-05 mol/l |
| Class <sup>?</sup>                     | Moderately soluble              |

#### Pharmacokinetics

|                                                          |            |
|----------------------------------------------------------|------------|
| GI absorption <sup>?</sup>                               | Low        |
| BBB permeant <sup>?</sup>                                | No         |
| P-gp substrate <sup>?</sup>                              | No         |
| CYP1A2 inhibitor <sup>?</sup>                            | No         |
| CYP2C19 inhibitor <sup>?</sup>                           | Yes        |
| CYP2C9 inhibitor <sup>?</sup>                            | Yes        |
| CYP2D6 inhibitor <sup>?</sup>                            | No         |
| CYP3A4 inhibitor <sup>?</sup>                            | No         |
| Log <i>K</i> <sub>p</sub> (skin permeation) <sup>?</sup> | -6.13 cm/s |

#### Druglikeness

|                                    |                             |
|------------------------------------|-----------------------------|
| Lipinski <sup>?</sup>              | Yes; 1 violation: NorO>10   |
| Ghose <sup>?</sup>                 | Yes                         |
| Veber <sup>?</sup>                 | No; 1 violation: TPSA>140   |
| Egan <sup>?</sup>                  | No; 1 violation: TPSA>131.6 |
| Muegge <sup>?</sup>                | No; 1 violation: TPSA>150   |
| Bioavailability Score <sup>?</sup> | 0.55                        |

#### Medicinal Chemistry

|                                      |                                             |
|--------------------------------------|---------------------------------------------|
| PAINS <sup>?</sup>                   | 0 alert                                     |
| Brenk <sup>?</sup>                   | 2 alerts: N_oxide, nitro_group <sup>?</sup> |
| Leadlikeness <sup>?</sup>            | No; 2 violations: MW>350, XLOGP3>3.5        |
| Synthetic accessibility <sup>?</sup> | 3.69                                        |

Figure S21. ADMET prediction for compound 3d

## Molecule 9

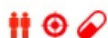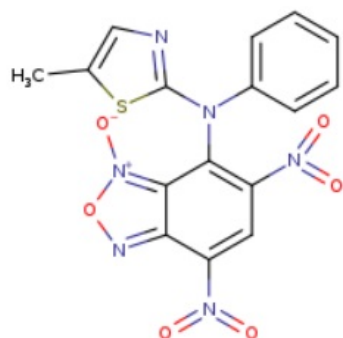

3e

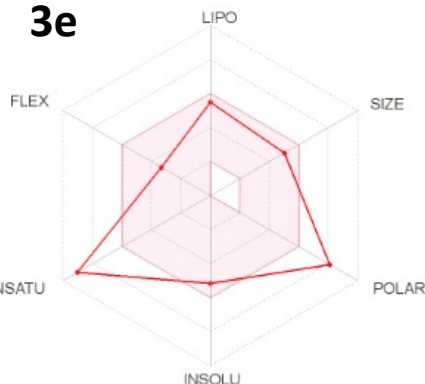

SMILES Cc1cnc(s1)N(c1c(cc(c2c1[n+](O-])on2)N(=O)=O)N(=O)=O)c1ccccc1

### Physicochemical Properties

|                           |                                                                 |
|---------------------------|-----------------------------------------------------------------|
| Formula                   | C <sub>16</sub> H <sub>10</sub> N <sub>6</sub> O <sub>6</sub> S |
| Molecular weight          | 414.35 g/mol                                                    |
| Num. heavy atoms          | 29                                                              |
| Num. arom. heavy atoms    | 20                                                              |
| Fraction Csp <sup>3</sup> | 0.06                                                            |
| Num. rotatable bonds      | 5                                                               |
| Num. H-bond acceptors     | 8                                                               |
| Num. H-bond donors        | 0                                                               |
| Molar Refractivity        | 108.14                                                          |
| TPSA                      | 187.50 Å <sup>2</sup>                                           |

### Lipophilicity

|                                         |       |
|-----------------------------------------|-------|
| Log <i>P</i> <sub>ow</sub> (iLOGP)      | 1.60  |
| Log <i>P</i> <sub>ow</sub> (XLOGP3)     | 4.08  |
| Log <i>P</i> <sub>ow</sub> (WLOGP)      | 4.56  |
| Log <i>P</i> <sub>ow</sub> (MLOGP)      | 1.44  |
| Log <i>P</i> <sub>ow</sub> (SILICOS-IT) | -1.25 |
| Consensus Log <i>P</i> <sub>ow</sub>    | 2.08  |

### Water Solubility

|                           |                                 |
|---------------------------|---------------------------------|
| Log <i>S</i> (ESOL)       | -5.16                           |
| Solubility                | 2.87e-03 mg/ml ; 6.92e-06 mol/l |
| Class                     | Moderately soluble              |
| Log <i>S</i> (Ali)        | -7.72                           |
| Solubility                | 7.85e-06 mg/ml ; 1.89e-08 mol/l |
| Class                     | Poorly soluble                  |
| Log <i>S</i> (SILICOS-IT) | -4.43                           |
| Solubility                | 1.55e-02 mg/ml ; 3.74e-05 mol/l |
| Class                     | Moderately soluble              |

### Pharmacokinetics

|                                             |            |
|---------------------------------------------|------------|
| GI absorption                               | Low        |
| BBB permeant                                | No         |
| P-gp substrate                              | No         |
| CYP1A2 inhibitor                            | No         |
| CYP2C19 inhibitor                           | Yes        |
| CYP2C9 inhibitor                            | Yes        |
| CYP2D6 inhibitor                            | No         |
| CYP3A4 inhibitor                            | No         |
| Log <i>K</i> <sub>p</sub> (skin permeation) | -5.93 cm/s |

### Druglikeness

|                       |                             |
|-----------------------|-----------------------------|
| Lipinski              | Yes; 1 violation: NorO>10   |
| Ghose                 | Yes                         |
| Veber                 | No; 1 violation: TPSA>140   |
| Egan                  | No; 1 violation: TPSA>131.6 |
| Muegge                | No; 1 violation: TPSA>150   |
| Bioavailability Score | 0.55                        |

### Medicinal Chemistry

|                         |                                      |
|-------------------------|--------------------------------------|
| PAINS                   | 0 alert                              |
| Brenk                   | 2 alerts: N_oxide, nitro_group       |
| Leadlikeness            | No; 2 violations: MW>350, XLOGP3>3.5 |
| Synthetic accessibility | 3.76                                 |

Figure S22. ADMET prediction for compound 3e

# Molecule 1

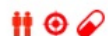

3f

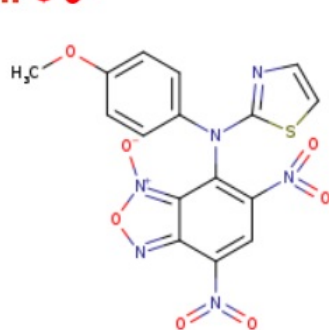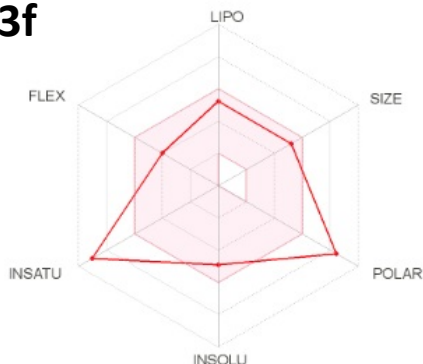

SMILES COc1ccc(cc1)N(c1c(cc(c2c1[n+](=[O-])on2)N(=O)=O)N(=O)=O)c1nccs1

## Physicochemical Properties

|                           |                                                                 |
|---------------------------|-----------------------------------------------------------------|
| Formula                   | C <sub>16</sub> H <sub>10</sub> N <sub>6</sub> O <sub>7</sub> S |
| Molecular weight          | 430.35 g/mol                                                    |
| Num. heavy atoms          | 30                                                              |
| Num. arom. heavy atoms    | 20                                                              |
| Fraction Csp <sup>3</sup> | 0.06                                                            |
| Num. rotatable bonds      | 6                                                               |
| Num. H-bond acceptors     | 9                                                               |
| Num. H-bond donors        | 0                                                               |
| Molar Refractivity        | 109.66                                                          |
| TPSA <sup>2</sup>         | 196.73 Å <sup>2</sup>                                           |

## Lipophilicity

|                                                      |       |
|------------------------------------------------------|-------|
| Log <i>P</i> <sub>ow</sub> (iLOGP) <sup>2</sup>      | 1.51  |
| Log <i>P</i> <sub>ow</sub> (XLOGP3) <sup>2</sup>     | 3.65  |
| Log <i>P</i> <sub>ow</sub> (WLOGP) <sup>2</sup>      | 4.26  |
| Log <i>P</i> <sub>ow</sub> (MLOGP) <sup>2</sup>      | 0.95  |
| Log <i>P</i> <sub>ow</sub> (SILICOS-IT) <sup>2</sup> | -1.70 |
| Consensus Log <i>P</i> <sub>ow</sub> <sup>2</sup>    | 1.74  |

## Water Solubility

|                                        |                                 |
|----------------------------------------|---------------------------------|
| Log <i>S</i> (ESOL) <sup>2</sup>       | -4.91                           |
| Solubility                             | 5.36e-03 mg/ml ; 1.24e-05 mol/l |
| Class <sup>2</sup>                     | Moderately soluble              |
| Log <i>S</i> (Ali) <sup>2</sup>        | -7.47                           |
| Solubility                             | 1.46e-05 mg/ml ; 3.39e-08 mol/l |
| Class <sup>2</sup>                     | Poorly soluble                  |
| Log <i>S</i> (SILICOS-IT) <sup>2</sup> | -4.15                           |
| Solubility                             | 3.03e-02 mg/ml ; 7.03e-05 mol/l |
| Class <sup>2</sup>                     | Moderately soluble              |

## Pharmacokinetics

|                                                          |            |
|----------------------------------------------------------|------------|
| GI absorption <sup>2</sup>                               | Low        |
| BBB permeant <sup>2</sup>                                | No         |
| P-gp substrate <sup>2</sup>                              | No         |
| CYP1A2 inhibitor <sup>2</sup>                            | No         |
| CYP2C19 inhibitor <sup>2</sup>                           | Yes        |
| CYP2C9 inhibitor <sup>2</sup>                            | Yes        |
| CYP2D6 inhibitor <sup>2</sup>                            | No         |
| CYP3A4 inhibitor <sup>2</sup>                            | Yes        |
| Log <i>K</i> <sub>p</sub> (skin permeation) <sup>2</sup> | -6.33 cm/s |

## Druglikeness

|                                    |                             |
|------------------------------------|-----------------------------|
| Lipinski <sup>2</sup>              | Yes; 1 violation: NorO>10   |
| Ghose <sup>2</sup>                 | Yes                         |
| Veber <sup>2</sup>                 | No; 1 violation: TPSA>140   |
| Egan <sup>2</sup>                  | No; 1 violation: TPSA>131.6 |
| Muegge <sup>2</sup>                | No; 1 violation: TPSA>150   |
| Bioavailability Score <sup>2</sup> | 0.55                        |

## Medicinal Chemistry

|                                      |                                             |
|--------------------------------------|---------------------------------------------|
| PAINS <sup>2</sup>                   | 0 alert                                     |
| Brenk <sup>2</sup>                   | 2 alerts: N_oxide, nitro_group <sup>2</sup> |
| Leadlikeness <sup>2</sup>            | No; 2 violations: MW>350, XLOGP3>3.5        |
| Synthetic accessibility <sup>2</sup> | 3.68                                        |

Figure S23. ADMET prediction for compound 3f



## Molecule 8

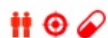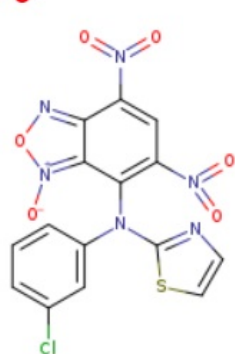

**3g**

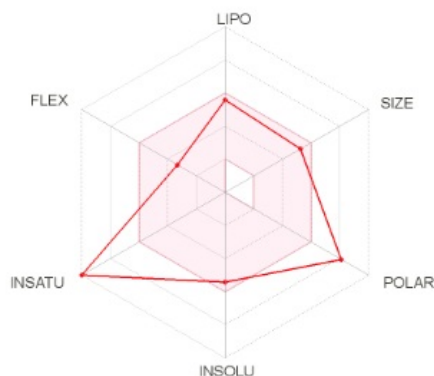

SMILES Clc1cccc(c1)N(c1c(cc(c2c1[n+][O-])n2)N(=O)=O)N(=O)=O)c1ncsc1

### Physicochemical Properties

|                        |              |
|------------------------|--------------|
| Formula                | C15H7ClN6O6S |
| Molecular weight       | 434.77 g/mol |
| Num. heavy atoms       | 29           |
| Num. arom. heavy atoms | 20           |
| Fraction Csp3          | 0.00         |
| Num. rotatable bonds   | 5            |
| Num. H-bond acceptors  | 8            |
| Num. H-bond donors     | 0            |
| Molar Refractivity     | 108.18       |
| TPSA                   | 187.50 Å²    |

### Lipophilicity

|                           |       |
|---------------------------|-------|
| Log $P_{ow}$ (iLOGP)      | 0.76  |
| Log $P_{ow}$ (XLOGP3)     | 4.30  |
| Log $P_{ow}$ (WLOGP)      | 4.90  |
| Log $P_{ow}$ (MLOGP)      | 1.70  |
| Log $P_{ow}$ (SILICOS-IT) | -1.10 |
| Consensus Log $P_{ow}$    | 2.11  |

### Water Solubility

|                      |                                 |
|----------------------|---------------------------------|
| Log $S$ (ESOL)       | -5.42                           |
| Solubility           | 1.63e-03 mg/ml ; 3.76e-06 mol/l |
| Class                | Moderately soluble              |
| Log $S$ (Ali)        | -7.95                           |
| Solubility           | 4.87e-06 mg/ml ; 1.12e-08 mol/l |
| Class                | Poorly soluble                  |
| Log $S$ (SILICOS-IT) | -4.64                           |
| Solubility           | 1.00e-02 mg/ml ; 2.31e-05 mol/l |
| Class                | Moderately soluble              |

### Pharmacokinetics

|                             |            |
|-----------------------------|------------|
| GI absorption               | Low        |
| BBB permeant                | No         |
| P-gp substrate              | No         |
| CYP1A2 inhibitor            | No         |
| CYP2C19 inhibitor           | Yes        |
| CYP2C9 inhibitor            | No         |
| CYP2D6 inhibitor            | No         |
| CYP3A4 inhibitor            | No         |
| Log $K_p$ (skin permeation) | -5.90 cm/s |

### Druglikeness

|                       |                             |
|-----------------------|-----------------------------|
| Lipinski              | Yes; 1 violation: NorO>10   |
| Ghose                 | Yes                         |
| Veber                 | No; 1 violation: TPSA>140   |
| Egan                  | No; 1 violation: TPSA>131.6 |
| Muegge                | No; 1 violation: TPSA>150   |
| Bioavailability Score | 0.55                        |

### Medicinal Chemistry

|                         |                                      |
|-------------------------|--------------------------------------|
| PAINS                   | 0 alert                              |
| Brenk                   | 2 alerts: N_oxide, nitro_group       |
| Leadlikeness            | No; 2 violations: MW>350, XLOGP3>3.5 |
| Synthetic accessibility | 3.64                                 |

**Figure S24.** ADMET prediction for compound **3g**
